# Supplementary material
Source: publisher figshare collection journal article supplement (https://acs.figshare.com/ndownloader/files/4481251)
Supplement: Supplementary file 1 [file 4481251]

Supporting information for:

**Efficient discovery of fluorescent chemosensors based on a biarylpyridine scaffold.**

Sergey Malashikhin, Kim K. Baldrige and Nathaniel S. Finney

*Institute of Organic Chemistry, University of Zurich, Winterthurerstrasse 190, CH-8057, Zurich, Switzerland*

Contents

|                                                              |     |
|--------------------------------------------------------------|-----|
| 1. General notes and procedures                              | S2  |
| 2. Synthetic schemes                                         | S3  |
| 3. Synthetic details and tabulated spectroscopic data        | S5  |
| 4. Absorption spectra                                        | S11 |
| 5. Emission spectra and metal titrations                     | S13 |
| 6. Calculated structures and relative energies               | S19 |
| 7. References                                                | S25 |
| 8. Copies of $^1\text{H}$ - and $^{13}\text{C}$ -NMR spectra | S26 |

## 1. General notes and procedures

$^1\text{H}$  NMR spectra were obtained on Bruker AV-300 (300 MHz) or AV2-400 (400 MHz) spectrometers. Chemical shifts are reported in parts per million (ppm) relative to tetramethylsilane (0.00 ppm). Multiplicities are given as: s (singlet), d (doublet), t (triplet), q (quartet), dd (doublet of doublets), m (multiplet). Coupling constants are reported in Hz.

$^1\text{H}$ -decoupled  $^{13}\text{C}$  NMR spectra were obtained on AV-300 (75 MHz) or AV2-400 (100 MHz) spectrometers.  $^{13}\text{C}$  NMR chemical shifts are reported relative to tetramethylsilane (0.00 ppm). IR frequencies are given in  $\text{cm}^{-1}$ ; spectra were obtained on a Perkin Elmer Spectrum One (FT-IR) spectrometer in KBr pellets.

Fluorescence measurements were carried out in spectroscopic grade DMSO or DMSO/aqueous MOPS on Edinburg FLS920, using 450W Xenon lamp excitation and 1 nm excitation and 5 nm emission slit widths. All samples were flushed with nitrogen to remove oxygen. Reported emission spectra were recorded at the global absorption maximum for each compound.

Quantum yields were determined by standard methods,<sup>1,2</sup> using pyrene ( $\phi = 0.32$ ) as the standard.<sup>3</sup> The samples were diluted to optical transparency (Abs = 0.04–0.05) and the integrated emission intensity was compared to an iso-absorptive solution of pyrene in degassed dichloromethane.

UV-Vis measurements were carried out on a Perkin-Elmer Lambda 19 UV-Vis spectrophotometer.

For extinction coefficient determination four independent solutions with different concentration were prepared with absorption between 0.04–0.10 AU. The value of  $\epsilon$  was calculated by linear least-squares fitting of plots of A vs. concentration. All fits gave  $R^2$  values of  $>0.98$ .

Flash chromatographic purification was performed by with Merck silica gel 60 (particle size 0.040–0.063 mm) packed in glass columns; eluting solvent for each purification was determined by thin layer chromatography (TLC). Analytical TLC was performed with Macherey–Nagel POLYGRAM SIL NHR/UV254 or ALOX N/UV254. Preparative TLC purification was carried out using PCS-plates silica gel 60 F254, 2 mm.

Synthetic procedures were carried out under an inert atmosphere, in dry solvent, using standard Schlenk techniques, unless otherwise noted. All reagents and solvents were reagent grade and were used without further purification unless otherwise specified.



## 2. Synthetic schemes.

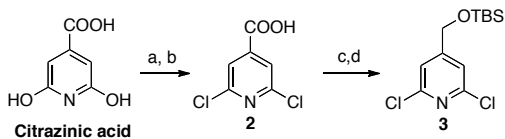

Reagents and conditions: a.  $\text{POCl}_3$ ,  $\text{Me}_4\text{NCl}$ ,  $\Delta$  then  $\text{CH}_3\text{OH}$ , 86%; b.  $\text{LiOH}$ ,  $\text{THF}/\text{H}_2\text{O}$ , ~100%; c.  $\text{BH}_3 \cdot \text{S}(\text{CH}_3)_2$ ,  $\text{THF}$ ,  $\Delta$ , 70%; d.  $\text{TBSCl}$ , imidazole,  $\text{DMAP}$ ,  $\text{CH}_2\text{Cl}_2$ , 85%

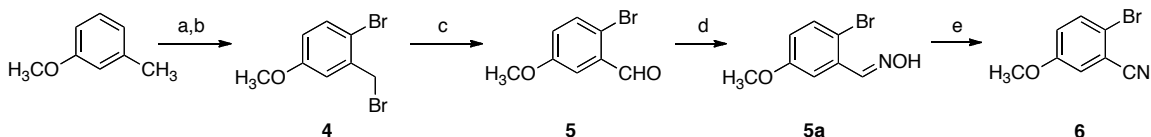

Reagents and conditions: a.  $\text{NBS}$ , acetonitrile, reflux, 89%; b.  $\text{NBS}$ ,  $\text{AIBN}$ ,  $\text{PhH}$ , reflux, 70%; c. hexamethylenetetramine,  $\text{AcOH}$  (50% solut.),  $\Delta$ , 90%; d.  $\text{NH}_2\text{OH} \cdot \text{H}_2\text{SO}_4$ ,  $\text{NaOH}$ ,  $\text{MeOH}$ , 84%; e.  $(\text{CF}_3\text{CO})_2\text{O}$ , pyridine, dioxane, 93%

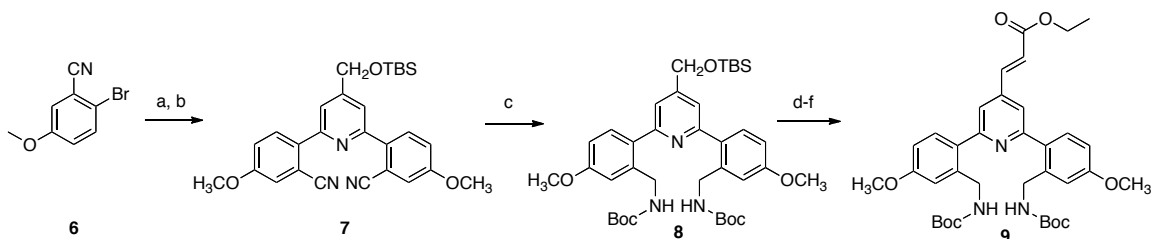

Reagents and conditions: a.  $\text{BuLi}$ ,  $-100^\circ\text{C}$ ,  $\text{THF}$ ; b.  $\text{ZnCl}_2$ ,  $\text{THF}$  then **3**, 69% over two steps c.  $\text{H}_2$ , 50 psi, Raney-Ni,  $(\text{Boc})_2\text{O}$ ,  $\text{EtOH}$ , 57-67%; d.  $\text{Bu}_4\text{NF}$ ,  $\text{THF}$ ,  $0^\circ\text{C}$ , 95%; e.  $(\text{COCl})_2$ ,  $\text{DMSO}$ ,  $-78^\circ\text{C}$ , then  $\text{Et}_3\text{N}$ , 77%; f.  $(\text{EtO})_2\text{P}(\text{O})\text{-CH}_2\text{COOEt}$ ,  $\text{KO}^t\text{Bu}$ ,  $\text{THF}$ ,  $0^\circ\text{C}$ , 74%;

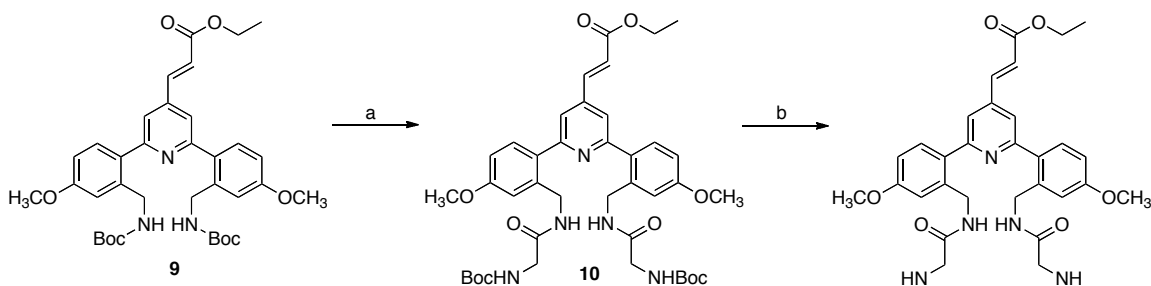

Reagents and conditions: a. 4M  $\text{HCl}$ /dioxane then Gly-Boc, EDC, DIEA, HOAt,  $\text{CH}_2\text{Cl}_2$ , 85%; b. 4M  $\text{HCl}$ /dioxane then  $\text{Et}_3\text{N}$ ,  $\text{PhNCS}$ , 54%

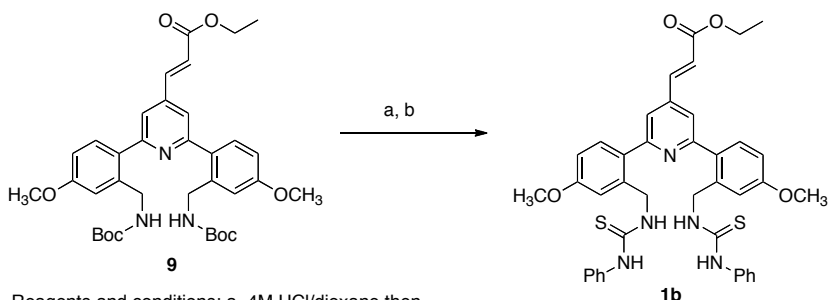

Reagents and conditions: a. 4M HCl/dioxane then Gly-Boc, EDC, DIEA, HOAt, CH<sub>2</sub>Cl<sub>2</sub>, 85%; b. 4M HCl/dioxane then Et<sub>3</sub>N, PhNCS, 54%

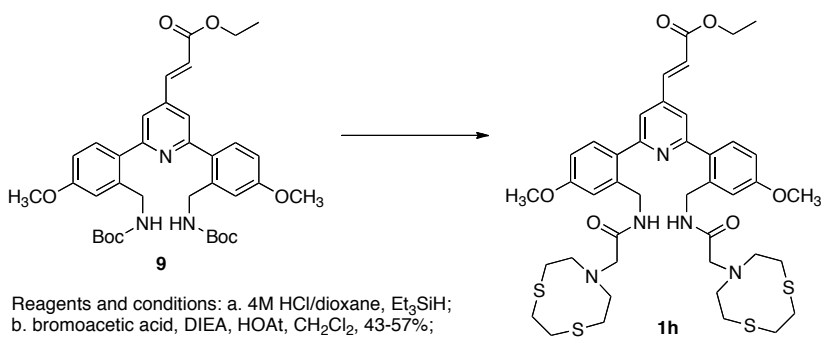

Reagents and conditions: a. 4M HCl/dioxane, Et<sub>3</sub>SiH; b. bromoacetic acid, DIEA, HOAt, CH<sub>2</sub>Cl<sub>2</sub>, 43-57%; c. **14**, K<sub>2</sub>CO<sub>3</sub>, THF, reflux, 48%

## Abbreviations:

NBS = N-Bromosuccinimide

AIBN = 2,2'-Azobis(2-methylpropionitrile)

EDC = *N*-Ethyl-*N'*-(3-dimethylaminopropyl)carbodiimide

DIEA = *N,N*-Diisopropylethylamine

TBSCl = *tert*-Butyldimethylsilyl chloride

HOAt = 1-Hydroxy-7-azabenzotriazole

### 3. Synthetic details and tabulated spectroscopic data.

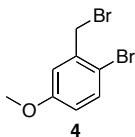

The compound was synthesized as described.<sup>4</sup> The <sup>1</sup>H NMR of this material was consisted with previously reported data.

<sup>1</sup>H-NMR (300 MHz, CDCl<sub>3</sub>): 7.45 (*d*, 1H, *J*=8.8 Hz), 6.99 (*d*, 1H, *J*=3.2 Hz), 6.74 (*dd*, 1H, *J*=8.8, 2.8 Hz), 4.55 (*s*, 2H), 3.80 (*s*, 3H).

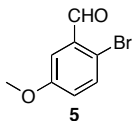

The solution of 4-bromo-3-bromomethylanisole **4** (0.70 g, 2.50 mmol, 1.00 eq) and hexamethylenetetramine (0.75 g, 5.40 mmol, 2.20 eq) 50% acetic acid (3.00 mL) was refluxed for 2 h.<sup>5</sup> After cooling to room temperature the mixture was diluted with 10 mL water and extracted with CH<sub>2</sub>Cl<sub>2</sub>. The organic fraction was washed with H<sub>2</sub>O, then NaHCO<sub>3</sub> solution, dried over Na<sub>2</sub>SO<sub>4</sub> and concentrated. The purification on silica gel (hexane/Et<sub>2</sub>O 10/1) provided 0.45 g (90%) of the product.

The <sup>1</sup>H NMR of this material was consisted with previously reported data.<sup>4</sup>

<sup>1</sup>H-NMR (300 MHz, CDCl<sub>3</sub>): 10.32 (*s*, 1H), 7.53 (*d*, 1H, *J*=8.8 Hz), 7.41 (*d*, 1H, *J*=2.8 Hz), 7.03 (*dd*, 1H, *J*=8.8, 2.8 Hz), 3.85 (*s*, 3H).

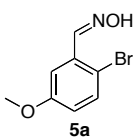

The oxime **5a** was synthesized as described.<sup>4</sup> The <sup>1</sup>H NMR of this material was consisted with previously reported data.

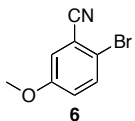

The solution of oxime **5a** (1.00 g, 4.00 mmol, 1 eq) and pyridine (1.40 g, 18.00 mmol, 4.40 eq) in dry dioxane (5 mL) was cooled in an ice bath. Trifluoroacetic acid anhydride (0.90 g, 4.40 mmol, 1.10 eq) was added dropwise.<sup>6</sup> The resulting mixture was stirred at 0°C for 1 h and 10 h at r.t. Then 50 mL HCl (~10%) was added. The solution was transferred to a separation funnel and extracted with CH<sub>2</sub>Cl<sub>2</sub>. The organic phase was washed with water, dried over Na<sub>2</sub>SO<sub>4</sub> and concentrated. The residue was passed through a plug of silica gel (hexane/EtOAc 20/1) to remove baseline impurities and the eluent concentrated to yield 0.79 g (93%) of the product.

The <sup>1</sup>H NMR of this material was consisted with previously reported data.<sup>4</sup>

<sup>1</sup>H-NMR (300 MHz, CDCl<sub>3</sub>): 7.54 (*d*, 1H, *J*=8.8 Hz), 7.15 (*d*, 1H, *J*=3.2 Hz), 7.00 (*dd*, 1H, *J*=9.2, 3.2 Hz), 3.83 (*s*, 3H).

Dichloropyridines **2-3** were prepared as described.<sup>4</sup> The <sup>1</sup>H NMR and MS of all compounds were consisted with previously reported data.

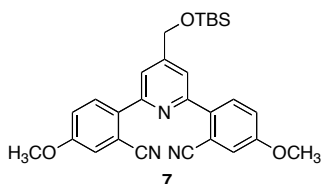

Aryl bromide **6** (0.43 g, 2.00 mmol, 2.00 eq) was dissolved in THF (10 mL) and cooled to -100°C, BuLi (1.26 mL, 1.60 M in hexane) was added dropwise and the resulting solution was stirred for 5 min at -100°C. The solution of ZnCl<sub>2</sub> (0.27 g, 2.00 mmol, 2.00 eq) in THF (5 mL) was added via syringe and the flask warmed to 23°C. The resulting solution was transferred to the second flask containing dichloropyridine derivative **3** (0.28 g, 1.00 mmol, 1.00 eq), Pd(PPh)<sub>4</sub> (0.055 g, 5%) in THF (5 mL) and this was heated for 14 h at 80°C. The solvent was removed with the rotary evaporator and the residue was purified by flash column chromatography (CH<sub>2</sub>Cl<sub>2</sub>/acetone 50/1) to yield 0.34 g (69%) of the product.

The <sup>1</sup>H NMR of this material was consisted with previously reported data.<sup>4</sup>

<sup>1</sup>H-NMR (300 MHz, CDCl<sub>3</sub>): 8.01 (*d*, 2H, *J*=8.8 Hz), 7.72 (*s*, 2H), 7.25 (*m*, 4H), 4.93 (*s*, 2H), 3.88 (*s*, 6H), 0.99 (*s*, 9H), 0.18 (*s*, 6H).

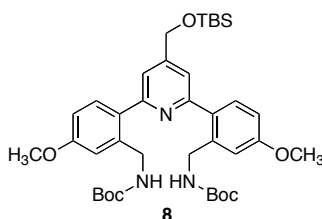

The dinitrile **7** (0.60 g, 1.24 mmol, 1.00 eq) was submitted to catalytic hydrogenation (50 psi) over Raney nickel (ca. 5 g) as a catalyst in ethanol (20.00 mL) in the presence of Boc-anhydride (0.75 g, 3.40 mmol, 2.70 eq) in a standard Parr instrument. After 30 h the reaction mixture was filtered through a plug of celite and concentrated. Purification by flash column chromatography (CH<sub>2</sub>Cl<sub>2</sub>/acetone 50/1) provided 1.50 g (57%) of the product.

The <sup>1</sup>H NMR of this material was consisted with previously reported data.<sup>4</sup>

<sup>1</sup>H-NMR (300 MHz, CDCl<sub>3</sub>): 7.41 (*d*, 2H, *J*=8.4 Hz), 7.33 (*s*, 2H), 7.04 (*d*, 2H, *J*=2.0 Hz), 6.91 (*dd*, 2H, *J*=8.8, 2.4 Hz), 5.73 (*b*, 2H), 4.85 (*s*, 2H), 4.26 (*d*, 4H, *J*=5.6 Hz), 3.86 (*s*, 6H), 1.38 (*s*, 18H), 0.99 (*s*, 9H), 0.17 (*s*, 6H).

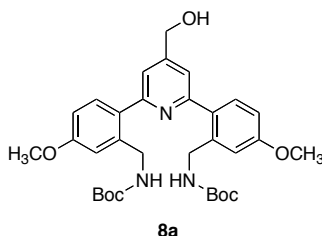

The compound **8a** was synthesized as described.<sup>4</sup> The <sup>1</sup>H NMR of this material was consisted with previously reported data.

<sup>1</sup>H-NMR (300 MHz, CDCl<sub>3</sub>): 7.47 (*d*, 2H, *J*=8.4), 7.39 (*s*, 2H), 7.00 (*d*, 2H, *J*=2.4), 6.91 (*dd*, 2H, *J*=8.4, 2.4), 5.67 (*b*, 2H), 4.81 (*d*, 2H, *J*=3.6), 4.30 (*d*, 4H, *J*=5.2), 3.86 (*s*, 6H), 2.76 (*b*, 1H), 1.37 (*s*, 18H).

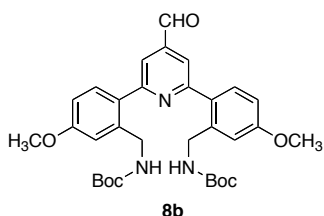

The compound **8b** was synthesized as described.<sup>4</sup> The <sup>1</sup>H NMR of this material was consisted with previously reported data.

<sup>1</sup>H-NMR (300 MHz, CDCl<sub>3</sub>): 10.15 (s, 1H), 7.79 (s, 2H), 7.47 (d, 2H, *J*=8.4 Hz), 7.06 (d, 2H, *J*=2.8), 6.94 (dd, 2H, *J*=8.4, 2.8 Hz), 5.61 (b, 2H), 4.30 (s, 4H), 3.88 (s, 6H), 1.38 (s, 18H).

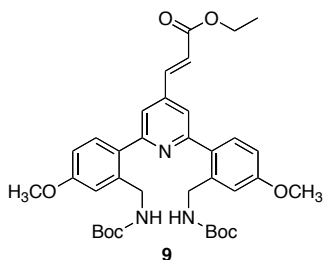

The compound **9** was synthesized as described.<sup>4</sup> The <sup>1</sup>H NMR of this material was consisted with previously reported data.

<sup>1</sup>H-NMR (300 MHz, CDCl<sub>3</sub>): 7.68 (d, 1H, *J*=16 Hz), 7.46 (s, 2H), 7.42 (d, 2H, *J*=8.8), 7.04 (d, 2H, *J*=2.4), 6.91 (dd, 2H, *J*=8.4, 2.4 Hz), 6.67 (d, 1H, *J*=16 Hz), 5.65 (b, 2H), 4.28 (m, 6H), 3.85 (s, 6H), 1.36 (m, 21H).

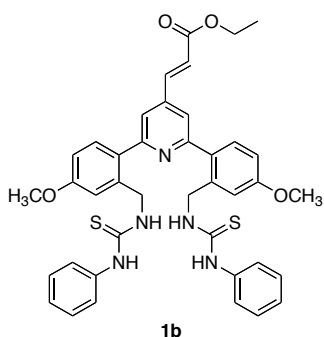

The Boc diamine **9** (30.00 mg, 0.046 mmol, 1.00 eq) was dissolved in 4 M HCl/dioxane <sup>i</sup>Pr<sub>3</sub>SiH (19:1, 5.00 mL) and stirred for 1 h at r.t. The volatile compounds were removed in vacuum and the residue redissolved in 10 mL CH<sub>2</sub>Cl<sub>2</sub> and Et<sub>3</sub>N (19.00 mg, 0.184 mmol, 4.00 eq). Phenylisothiocyanate (16.00 mg, 0.115 mmol, 2.50 eq) was added and the reaction stirred for 16 h at r.t. Purification by flash chromatography (SiO<sub>2</sub>, hexane/acetone 2/1) provided 20.00 mg (60%) of the

product **1b**.

<sup>1</sup>H-NMR (300 MHz, CDCl<sub>3</sub>): 7.64 (d, 1H, *J*=16.1 Hz), 7.38 (s, 1H), 7.28-7.22 (m, 3H), 7.09-6.98 (m, 6H), 6.96-6.83 (m, 4H), 6.65 (d, 1H, *J*=16.1 Hz), 4.83 (d, 4H, *J*=4.98 Hz), 4.28 (q, 2H, *J*=7.12 Hz), 3.83 (s, 6H), 1.34 (t, 3H, *J*=7.14 Hz).

<sup>13</sup>C-NMR (100 MHz, CDCl<sub>3</sub>): 179.98, 165.92, 160.23, 158.92, 143.40, 141.42, 136.84, 131.52, 131.22, 129.54, 126.54, 124.40, 123.64, 120.21, 115.45, 113.79, 61.04, 55.44, 47.82, 14.26.

IR (KBr), cm<sup>-1</sup>: 3276 (s), 2957 (m), 2836 (m), 1710 (vs), 1644 (m), 1607 (vs), 1449 (vs), 1310 (vs), 1182 (vs), 1036 (s).

HRMS-ESI: Calculated for C<sub>40</sub>H<sub>40</sub>N<sub>5</sub>O<sub>4</sub>S<sub>2</sub> [(M+H)]<sup>+</sup> 718.2522, found 718.2531.

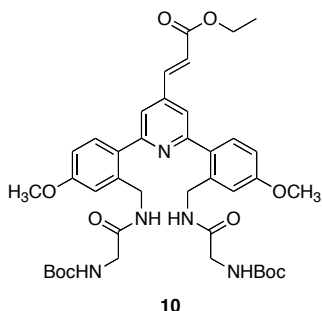

The Boc diamine **9** (8.00 mg, 0.0124 mmol, 1.00 eq) was dissolved in 4 M HCl/dioxane :  $i$ -Pr<sub>3</sub>SiH (19/1, 1 mL) and stirred for 1 h at r.t. The volatile compounds were removed in vacuum and the residue redissolved in 5 mL CH<sub>2</sub>Cl<sub>2</sub>, Boc-Gly (4.30 mg, 0.0248 mmol, 2.00 eq), HOAt (6.60 mg, 0.0496 mmol, 4.00 eq) was added at 0°C, followed by EDC (7.10 mg, 0.0372 mmol, 3 eq) and the resulting solution stirred for 2 h at 0°C and 14 h at r.t.

The reaction mixture was filtered, concentrated and purified by preparative TLC (CH<sub>2</sub>Cl<sub>2</sub>/acetone 10/1, 5/1) provided 6.10 mg (65%) of the product.

<sup>1</sup>H-NMR (300 MHz, CDCl<sub>3</sub>): 7.68 (*d*, 1H, *J*=16.0 Hz), 7.45 (*b*, 4H), 7.06-7.01 (*m*, 2H), 6.93 (*dd*, 2H, *J*=2.4, 8.4 Hz), 6.67 (*d*, 1H, *J*=16.0 Hz), 4.42 (*d*, 4H, *J*= 4.6 Hz), 4.30 (*q*, 2H, *J*=7.1 Hz), 3.39 (*s*, 6H), 1.46 (*b*, 18H), 1.38 (*t*, 3H, *J*=7.1 Hz).

<sup>13</sup>C-NMR (100 MHz, *d*<sub>6</sub>-acetone): 170.99, 167.67, 162.20, 161.09, 145.21, 143.88, 140.91, 134.10, 133.42, 125.23, 122.09, 114.51, 80.34, 62.29, 56.78, 45.69, 42.96, 29.64, 15.67, 6.96.

IR (KBr), cm<sup>-1</sup>: 3426 (*s*), 2978 (*w*), 1712 (*vs*), 1669 (*vs*), 1608 (*s*), 1546 (*s*), 1506 (*s*), 1286 (*s*), 1169 (*vs*), 1038 (*m*).

HRMS-ESI: Calculated for C<sub>40</sub>H<sub>51</sub>N<sub>5</sub>NaO<sub>10</sub> [(M+Na)]<sup>+</sup> 784.3534, found 784.3533.

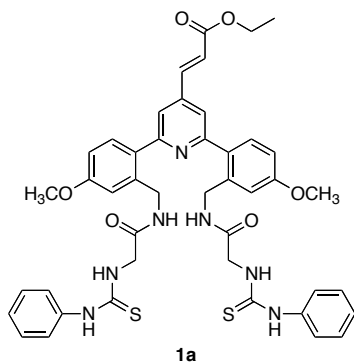

The Boc-Gly compound **10** (37.00 mg, 0.049 mmol, 1.00 eq) was dissolved in 4 M HCl/dioxane  $i$ -Pr<sub>3</sub>SiH (19:1, 5.00 mL) and stirred for 1 h at r.t. The volatile compounds were removed in vac. and the residue redissolved in 10 mL CH<sub>2</sub>Cl<sub>2</sub> and Et<sub>3</sub>N (50.00 mg, 0.49 mmol, 10.00 eq). Phenylisothiocyanate (80.00 mg, 0.123 mmol, 2.50 eq) was added and the reaction stirred for 16 h at r.t. Purification by flash chromatography (SiO<sub>2</sub>, CH<sub>2</sub>Cl<sub>2</sub>/acetone 10/1) provided 22.00 mg (54%) of the product **1a**.

<sup>1</sup>H-NMR (300 MHz, CDCl<sub>3</sub>): 8.40 (*b*, 2H), 7.68 (*d*, 1H, *J*=16.04), 7.54 (*t*-like, *b*, 2H), 7.47 (*s*, 2H), 7.41 (*d*, 2H, *J*=8.49), 7.36-7.16 (*m*, 11H), 7.12 (*t*-like, 2H), 7.15 (*d*, 2H, *J*=2.64), 6.92 (*dd*, 2H, *J*=8.52, 2.64), 6.69 (*d*, 1H, *J*=16.04), 4.42 (*d*, 4H, *J*=5.84), 4.25 (*q*, 2H, *J*=7.13), 3.79 (*s*, 6H), 1.32 (*t*, 3H, *J*=7.12).

$^{13}\text{C}$ -NMR (100 MHz,  $\text{CDCl}_3$ ): 181.22, 168.67, 166.51, 160.92, 159.54, 144.19, 142.04, 138.28, 132.53, 131.96, 127.06, 126.95, 125.18, 123.97, 120.73, 115.87, 113.73, 61.55, 56.06, 48.69, 42.37, 14.61.

IR (KBr),  $\text{cm}^{-1}$ : 3337 (s), 1661 (vs), 1608 (vs), 1498 (s), 1311 (m), 1241 (m).

HRMS-ESI: Calculated for  $\text{C}_{44}\text{H}_{46}\text{N}_7\text{O}_6\text{S}_2$  [(M+H) $^+$ ] 832.2951, found 832.2951.

### 7-Aza-1,4-dithiacyclononane (11)

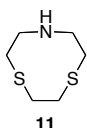

7-Aza-1,4-dithiacyclononane was prepared according to the literature.<sup>7</sup> After deprotection, **11** was isolated in 11% overall yield.

$^1\text{H}$ -NMR (300 MHz,  $\text{CDCl}_3$ ): 3.04-2.99 (*m*, 6H), 2.83-2.79 (*m*, 6H).

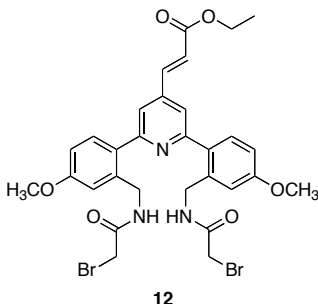

Compound **9** (8.00 mg, 0.0124 mmol, 1.00 eq) was dissolved in 4 M HCl/dioxane  $i\text{Pr}_3\text{SiH}$  (19:1, 1.00 mL) and stirred for 1 h at r.t. The volatile compounds were removed in vacuum and the residue redissolved in 3 mL  $\text{CH}_2\text{Cl}_2$  and DIEA (4.80 mg, 0.0372 mmol, 3.00 eq).  $\alpha$ -Bromoacetic acid (3.40 mg, 0.0248 mmol, 2.00 eq), HOAt (6.60 mg, 0.0496 mmol, 4.00 eq), EDC (7.10 mg, 0.0372 mmol, 3.00 eq) was added at 0°C and the resulting solution stirred for 2 h at 0°C and for 4h at r.t. The reaction mixture was filtered, concentrated and purified by preparative TLC ( $\text{CH}_2\text{Cl}_2$ /acetone 10/1) provided 4.50 mg (53%) of **12**. The yield in this reaction varies from 43% to 57%.

$^1\text{H}$ -NMR (300 MHz,  $\text{CDCl}_3$ ): 7.70 (*d*, 1H,  $J=16.1$  Hz), 7.56-7.37 (*m*, 6 H), 7.08-7.01 (*m*, 2H), 6.99-6.91 (*m*, 2H), 6.66 (*d*, 1H,  $J=16.06$  Hz), 4.30 (*q*, 2H,  $J=7.15$  Hz), 3.86 (*s*, 6H), 3.80 (*d*, 4H,  $J=2.19$  Hz), 3.62 (*d*, 4H,  $J=1.89$ ), 1.35 (*t*, 3H,  $J=7.15$  Hz).

$^{13}\text{C}$ -NMR (100 MHz,  $\text{CDCl}_3$ ): 165.34, 160.43, 160.39, 159.61, 141.36, 137.41, 131.14, 131.07, 120.24, 115.79, 115.76, 113.79, 61.08, 55.57, 42.41, 42.27, 14.26.

IR (KBr),  $\text{cm}^{-1}$ : 3377 (m), 3265 (m), 3063 (w), 2957 (m), 2837 (w), 1721 (vs), 1667 (vs), 1609 (vs), 1311 (vs), 1039 (vs).

HRMS-ESI: Calculated for  $\text{C}_{30}\text{H}_{32}\text{Br}_2\text{N}_3\text{O}_6$  [(M+H) $^+$ ] 688.0658, found 688.0652.

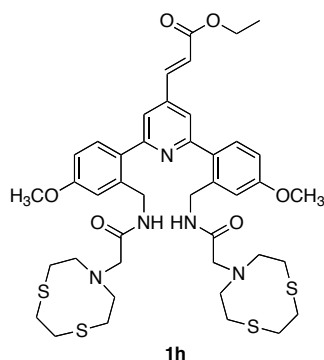

To the solution of **12** (28.00 mg, 0.41 mmol, 1eq) and 7-aza-1,4-dithiacyclononane **16** (20.00 mg, 0.123 mmol, 3 eq) in 5 mL THF  $K_2CO_3$  (170.00 mg, 0.123 mmol, 3 eq) was added. The reaction mixture was stirred and refluxed for 20 h. Then water (20 mL) was added. After extraction with  $CH_2Cl_2$  (x 2) the organic phase was dried over  $MgSO_4$  and concentrated. Purification by flash column chromatography yielded 16.00 mg (48%) of the product **1h**.

$^1H$ -NMR (400 MHz,  $CDCl_3$ ): 8.52 (*t-like*, 2H), 7.62 (*d*, 1H,  $J=16.04$ ), 7.42 (*s*, 2H), 7.38 (*d*, 2H,  $J=8.49$ ), 6.85 (*dd*, 2H,  $J=2.64$ , 8.48), 6.59 (*d*, 1H,  $J=16.01$ ), 4.49 (*d*, 4H,  $J=5.68$ ), 4.22 (*q*, 2H,  $J=7.12$ ), 3.78 (*s*, 6H), 3.06 (*s*, 4H), 2.73-2.65 (*m*, 14H), 2.57-2.52 (*m*, 24H), 1.28 (*t*, 3H,  $J=7.12$ ).

$^{13}C$ -NMR (100 MHz,  $CDCl_3$ ): 171.09, 166.52, 160.60, 159.67, 143.28, 142.39, 138.52, 133.03, 131.94, 123.68, 120.68, 115.76, 113.76, 61.44, 60.87, 56.69, 56.00, 41.89, 34.68, 33.26, 14.78.

IR (KBr),  $cm^{-1}$ : 3259 (*s*), 2908 (*s*), 2832 (*m*), 1713 (*s*), 1666 (*vs*), 1607 (*vs*), 1183 (*s*), 1038 (*s*).

HRMS-ESI: Calculated for  $C_{42}H_{55}N_5NaO_6S_4$   $[(M+Na+H)^+]$  876.2933, found 876.2932.



#### 4. Absorption spectra.

Figure 1. Absorption spectra of **1a** ( $5 \times 10^{-5}$  M, DMSO/MOPS<sub>aq</sub>).

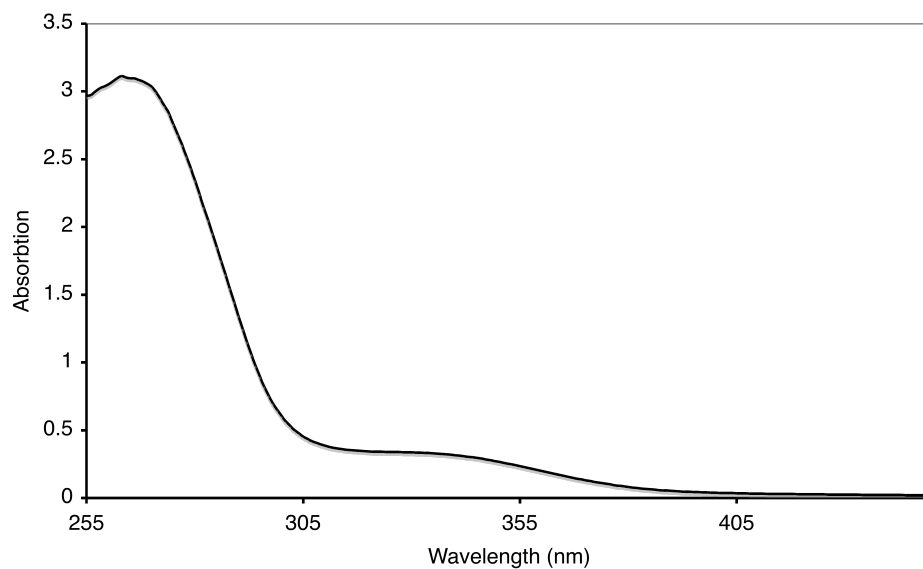

Figure 2. Absorption spectra of **1b** ( $5 \times 10^{-5}$  M, DMSO/MOPS<sub>aq</sub>).

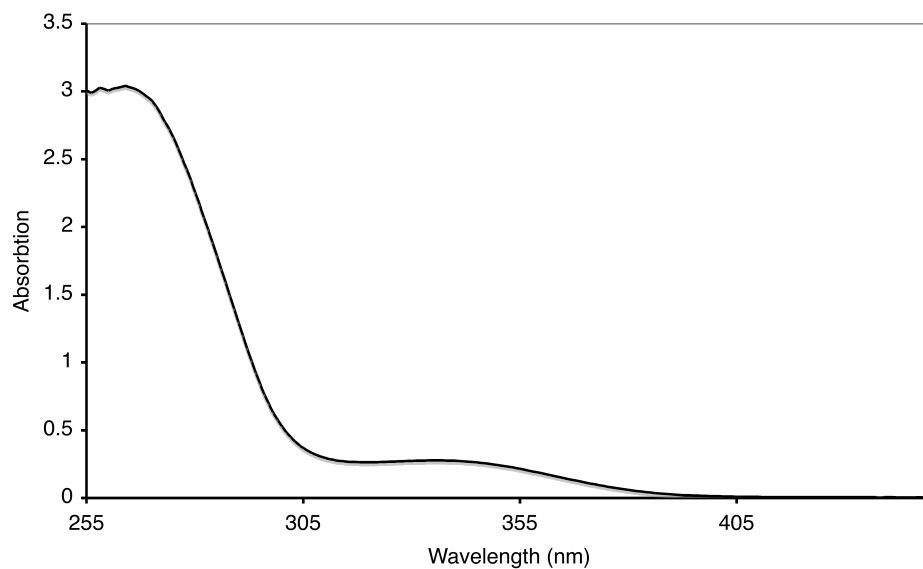

Figure 3. Absorption spectra of **1h** ( $5 \times 10^{-6}$  M, DMSO).

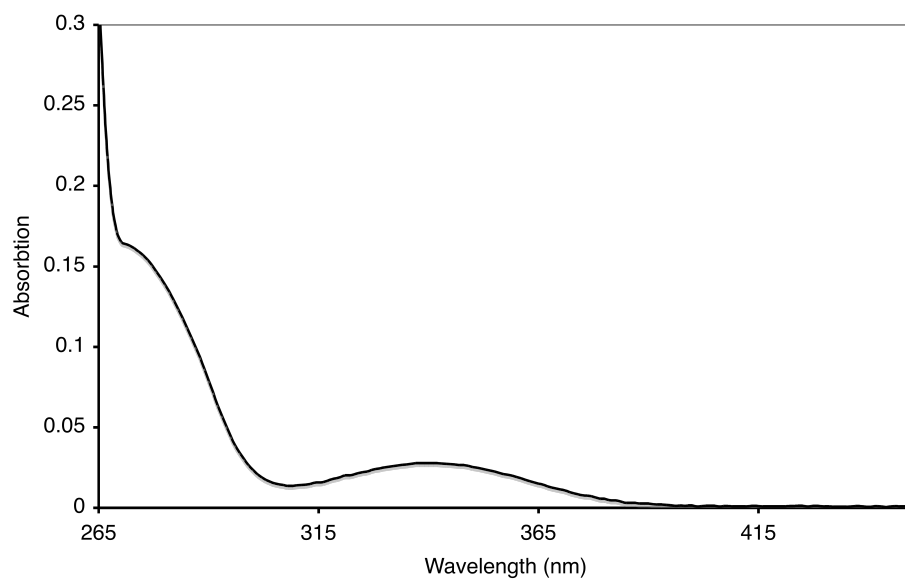

## 5. Emission spectra and metal titrations

All metal titrations were carried out using  $5 \times 10^{-5}$  M solutions in 1:1 DMSO/pH 7.4 aqueous MOPS unless otherwise noted. Mercury (II) was added as a  $10^{-3}$  M solution of  $\text{HgCl}_2$  in 1:1 DMSO/aqueous MOPS via micropipette to 2.500 mL of fluorophore solution in a quartz cuvette. The solutions were equilibrated by stirring prior to acquiring fluorescence spectra.

Figure 4. Emission spectra of  $\text{Hg}^{2+}$  titration of **1a**.

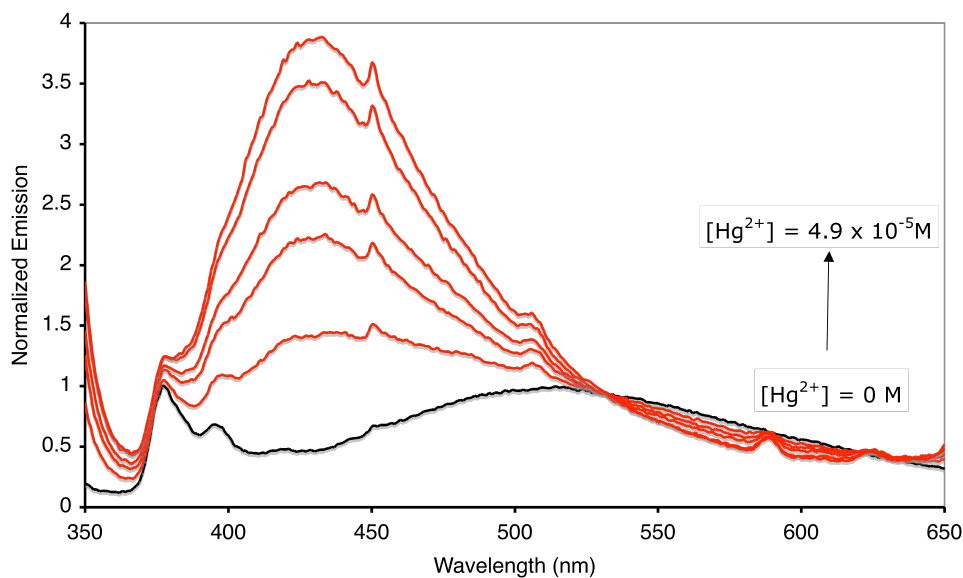

Figure 5. Change of  $I_{430}/I_{550}$  ratio upon titration with  $\text{Hg}^{2+}$ .

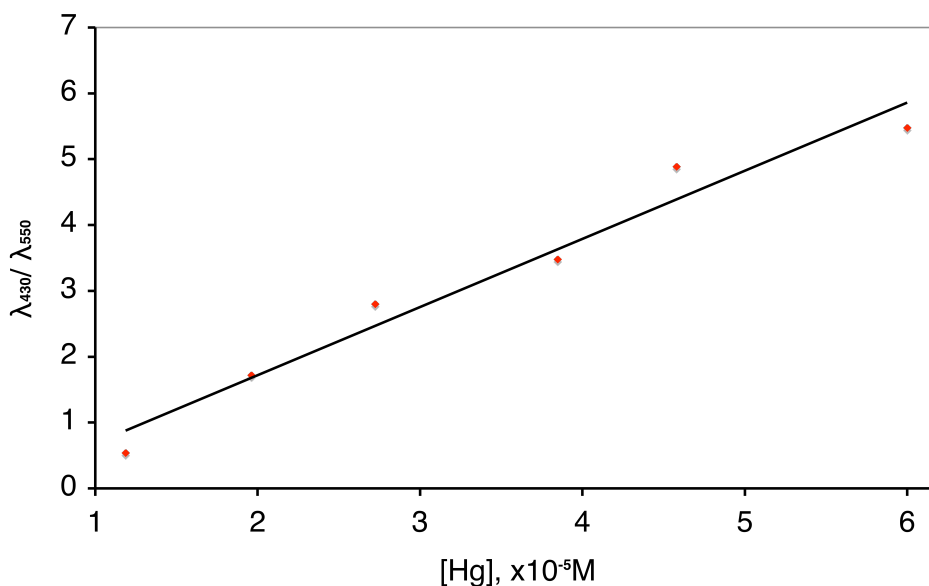

Figure 6. Emission spectra of  $\text{Ag}^+$  titration of **1a** ( $1 \times 10^{-4} \text{M}$ ).

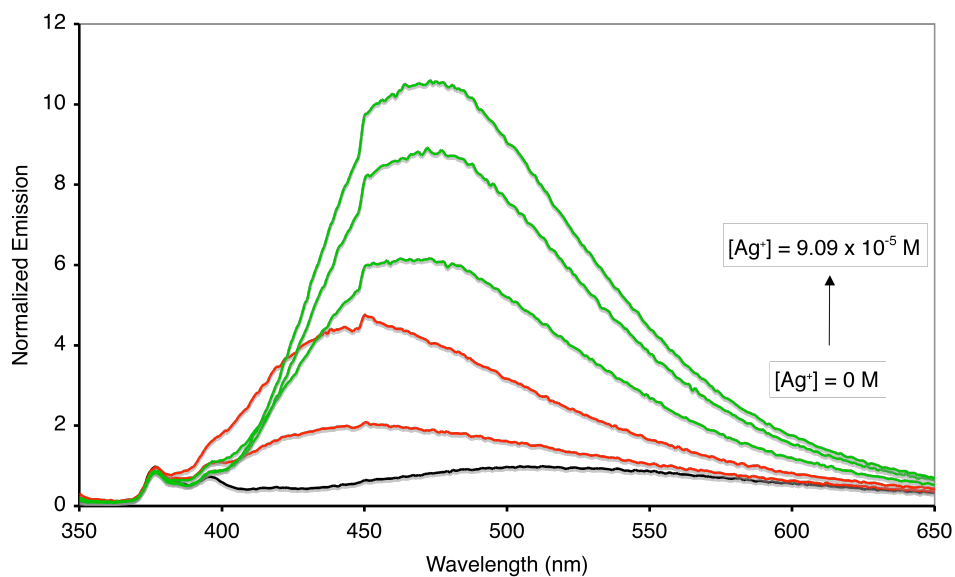

Figure 7. Emission spectra of  $\text{Hg}^{2+}$  titration of **1b**.

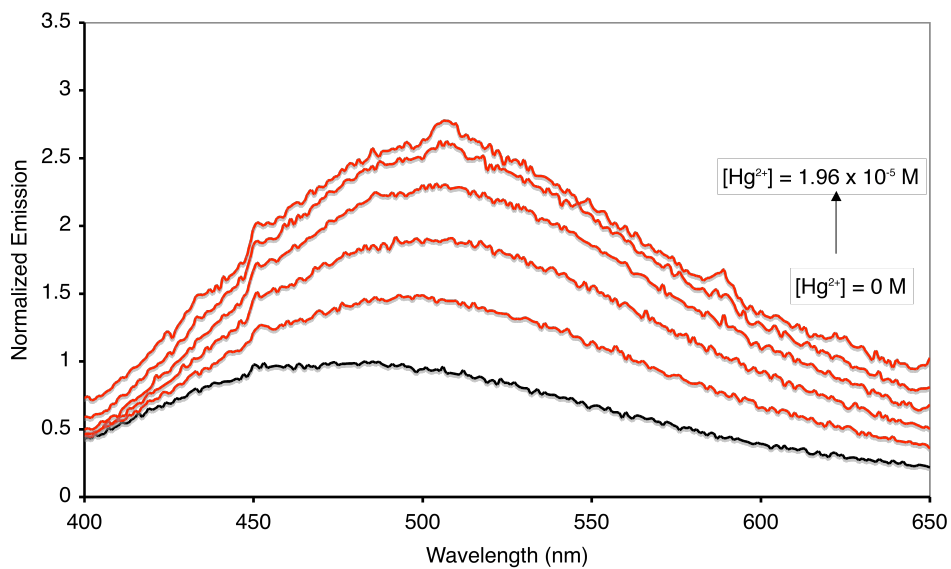

Figure 8. Emission spectra of  $\text{Ag}^+$  titration of **1b**.

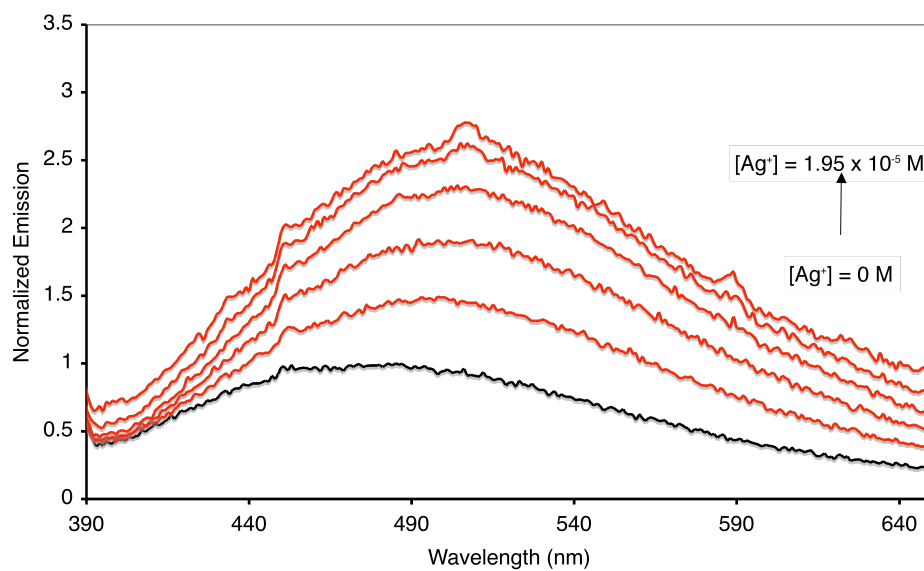

Figure 9. Emission spectra of  $\text{Hg}^{2+}$  titration of **1h** ( $1 \times 10^{-4} \text{ M}$ ).

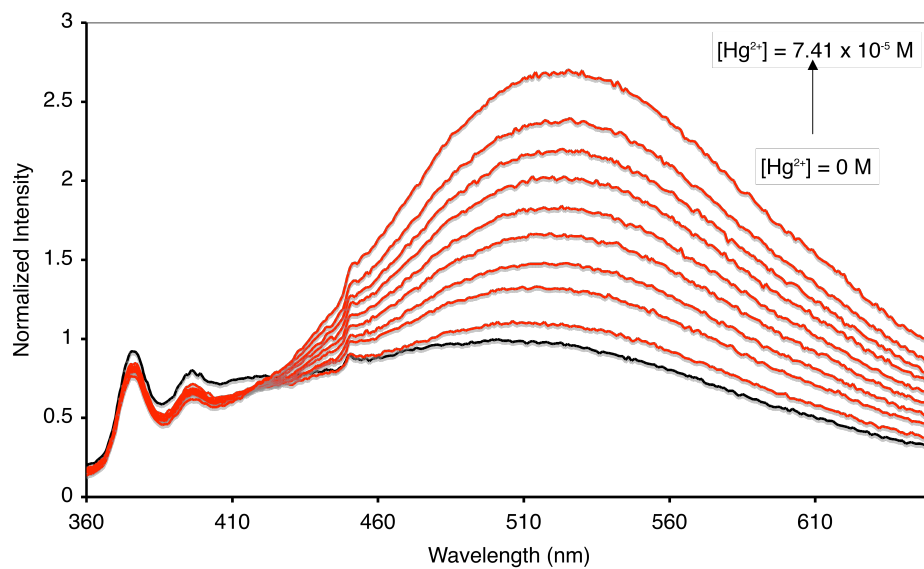

Figure 10. Emission spectra of  $\text{Ag}^+$  titration of **1h** ( $1 \times 10^{-4} \text{M}$ ).

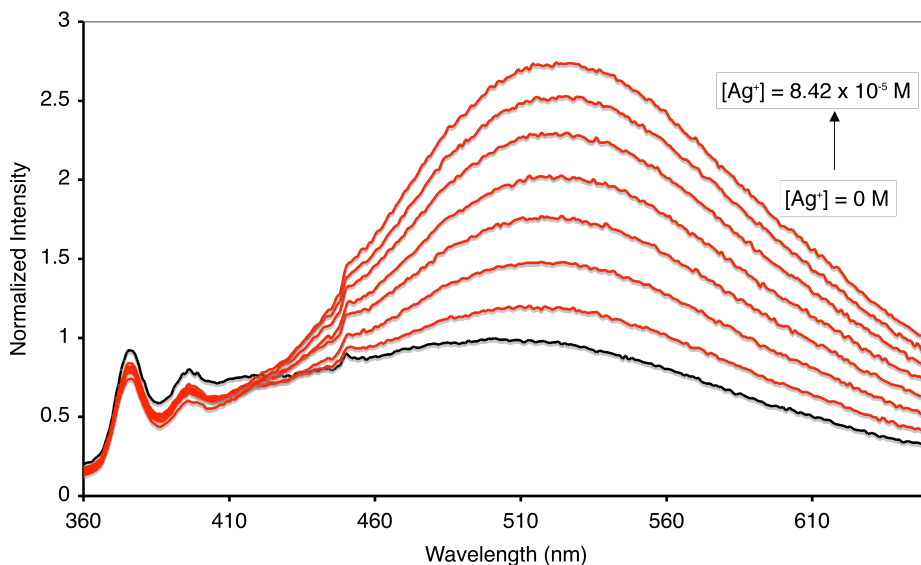

### $K_{\text{assoc}}$ Determination

The association constants  $K_{\text{assoc}}$  for the interaction of **1a**, **b**, **h** with  $\text{Hg}^{2+}$  and  $\text{Ag}^+$  ions were estimated by the nonlinear curve-fitting of plots of fluorescence intensity vs.  $\log[M]$  using *Prism3* (Graphpad, Inc., San Diego, CA). The titrations were carried out in a fluorescence cuvette by adding aliquots of  $\text{HgCl}_2$  or  $\text{AgOTs}$  solutions via micropipette to a fluorophore solution of known concentration. DMSO/aqueous MOPS ( $5 \mu\text{M}$ ) solvent mixture was used in all cases. The solutions were equilibrated by stirring prior to acquiring the fluorescence spectra.

### Determination of Stoichiometry

To determine binding stoichiometry the method of continuous variation (Job's method) was used, where titrations were performed holding the total concentration of  $\text{Hg(II)}$  or  $\text{Ag(I)}$  and ligand constant while varying the mole fraction of both.<sup>8</sup> To correct data for dilution UV spectra of all solutions were taken and the intensity at the emission maximum ( $I_{\text{max}}$ ) obtained from fluorescent spectra was divided by absorption at the excitation wavelength. The absorbance varies linearly with concentration in all cases.

Figure 11. Job's plot for **1a** +AgOTs ( $3 \times 10^{-5}$  M, DMSO/MOPS)

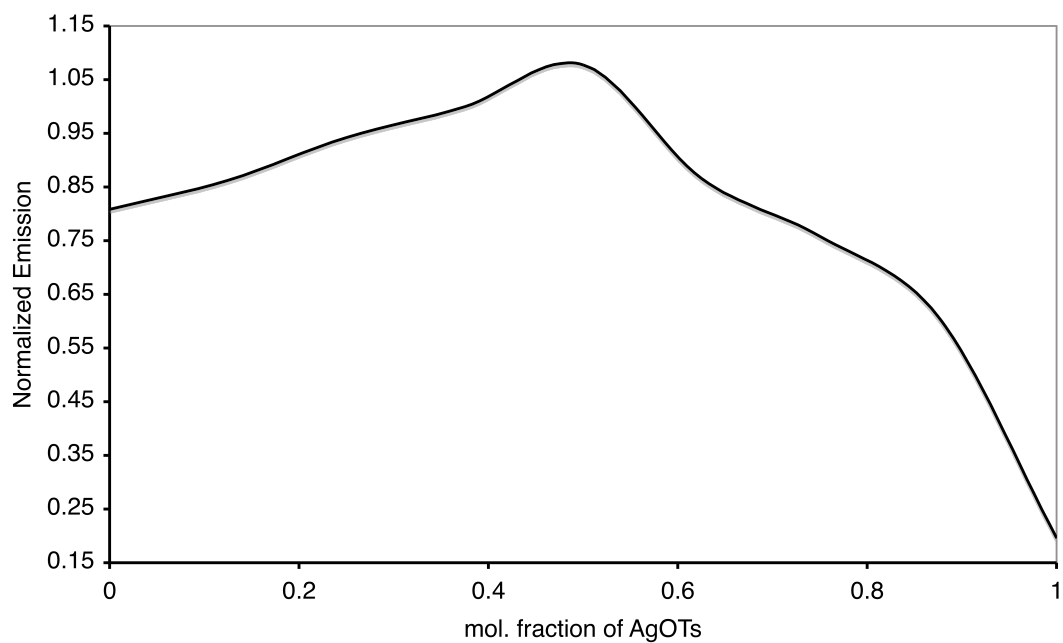

Figure 12. Job's plot for **1b** +AgOTs ( $3 \times 10^{-5}$  M, DMSO/MOPS)

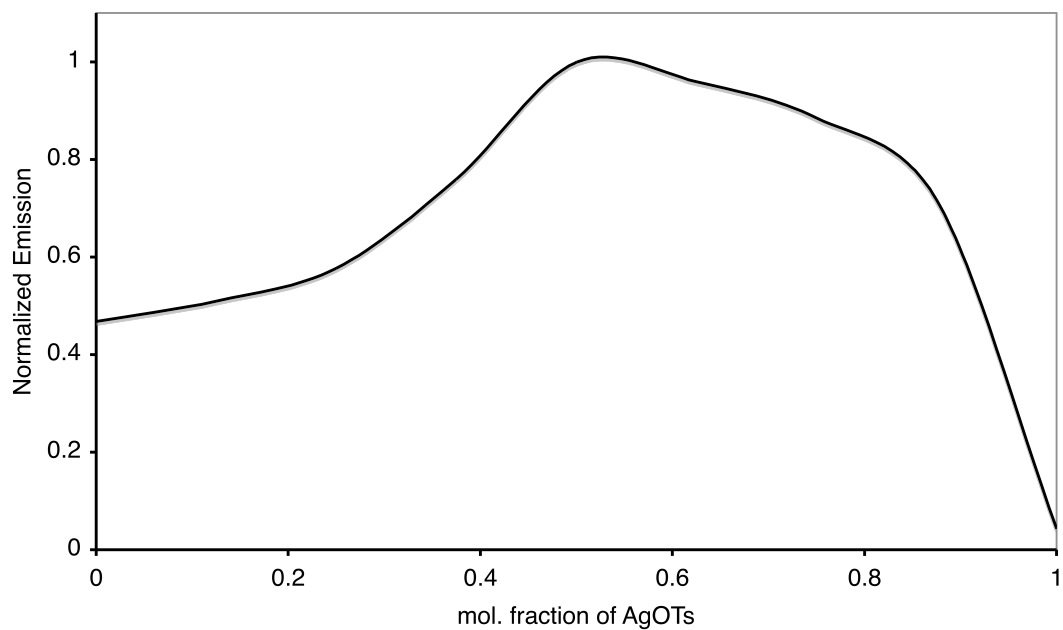

Figure 13. Job's plot for **1c** +AgOTs ( $3 \times 10^{-5}$  M, DMSO/MOPS)

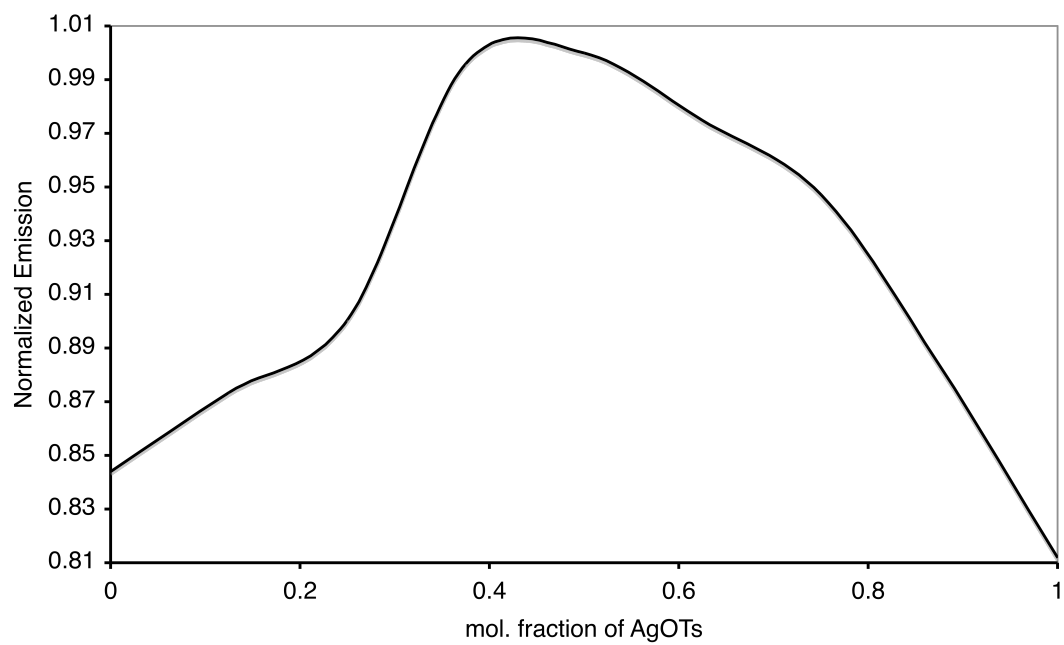



## 6. Calculated structures and relative energies

See ref. 20 (manuscript) for details of computational methodology.

Minimum-energy structures for **1a**•HgCl<sub>2</sub>.

B98/DZ(2d,p) optimized

| Structure                        | E <sub>rel</sub> / kcal/mol |
|----------------------------------|-----------------------------|
| <b>1a</b> •HgCl <sub>2</sub> O/O | 8.3                         |
| <b>1a</b> •HgCl <sub>2</sub> S/S | 3.4                         |
| <b>1a</b> •HgCl <sub>2</sub> S/O | 0.0                         |

Three minimum energy structures found, two similar in energy, one significantly higher in energy.

**1a**•HgCl<sub>2</sub> O/O – HgCl<sub>2</sub> coordinated to two carbonyl oxygen atoms.

Relative energy + 8.5 kcal/mol. (Figures 14, 15.)

**1a**•HgCl<sub>2</sub> S/S – HgCl<sub>2</sub> coordinated to two thiocarbonyl sulfur atoms.

Relative energy + 3.4 kcal/mol. (Figures 16, 17.)

**1a**•HgCl<sub>2</sub> S/O – HgCl<sub>2</sub> coordinated to one carbonyl oxygen and one thiocarbonyl sulfur atom. Relative energy 0 kcal/mol. (Figures 15, 16.)

Minimum-energy structures for **1b**•HgCl<sub>2</sub>.

B98/DZ(2d,p) optimized

| Structure                      | E <sub>rel</sub> / kcal/mol |
|--------------------------------|-----------------------------|
| <b>1b</b> •HgCl <sub>2</sub> A | 1.5                         |
| <b>1b</b> •HgCl <sub>2</sub> B | 0.0                         |

Two minimum energy structures found, differing only slightly in energy (Figures 20-23).

Figure 14. Ball-and-stick view of **1a**•HgCl<sub>2</sub> O/O.

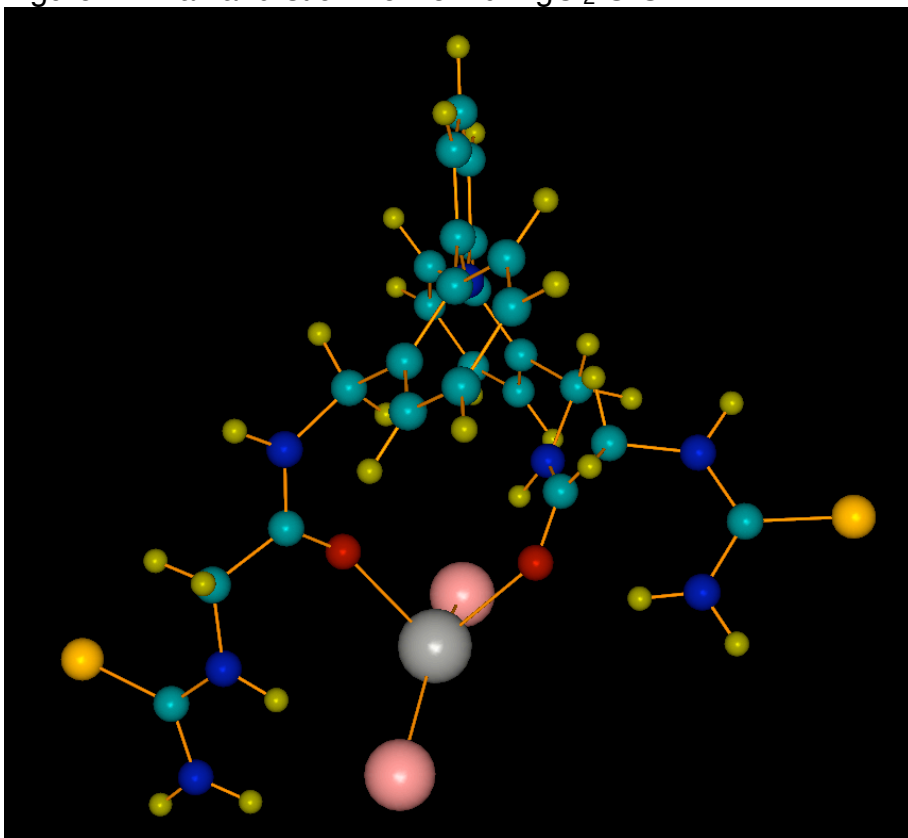

Figure 15. Space-filling view of **1a**•HgCl<sub>2</sub> O/O, with and without H atoms.

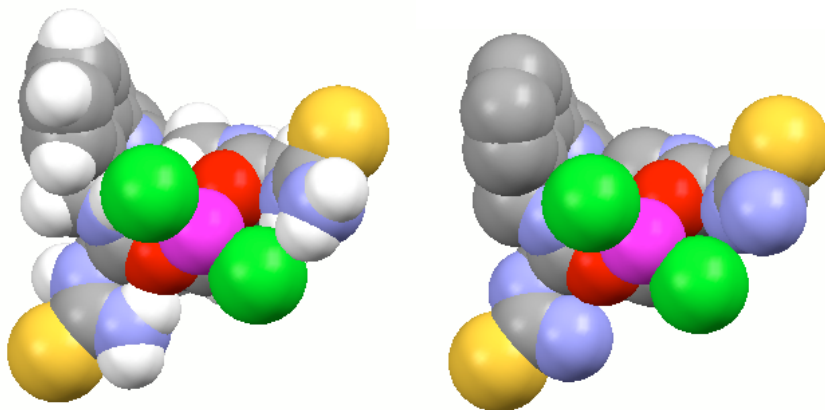

Figure 16. Ball-and-stick view of **1a**•HgCl<sub>2</sub> S/S.

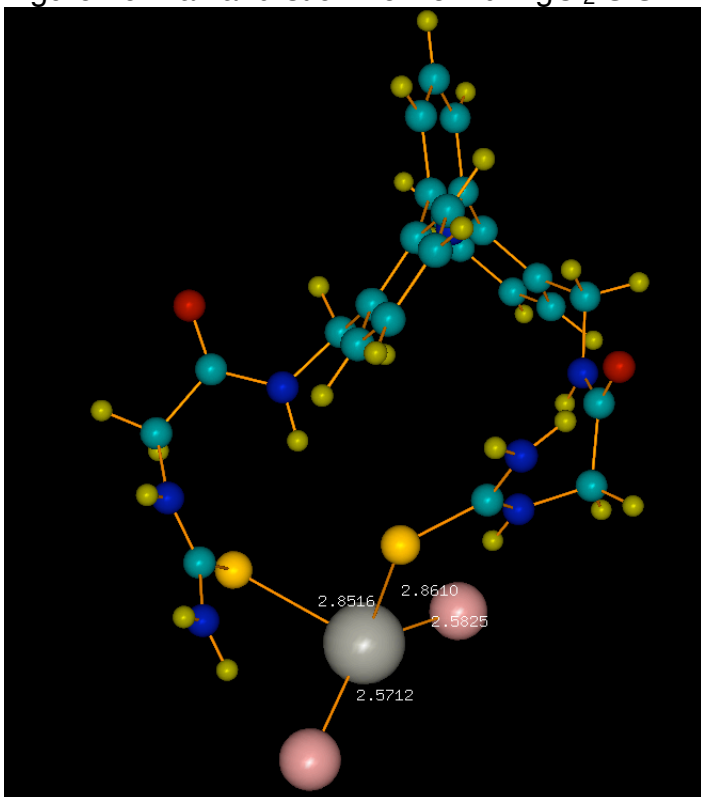

Figure 17. Space-filling view of **1a**•HgCl<sub>2</sub> S/S, with and without H atoms.

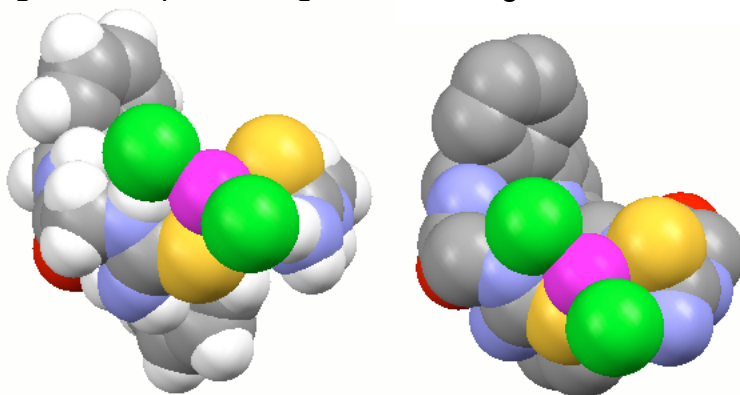

Figure 18. Ball-and-stick view of **1a**•HgCl<sub>2</sub> S/O.

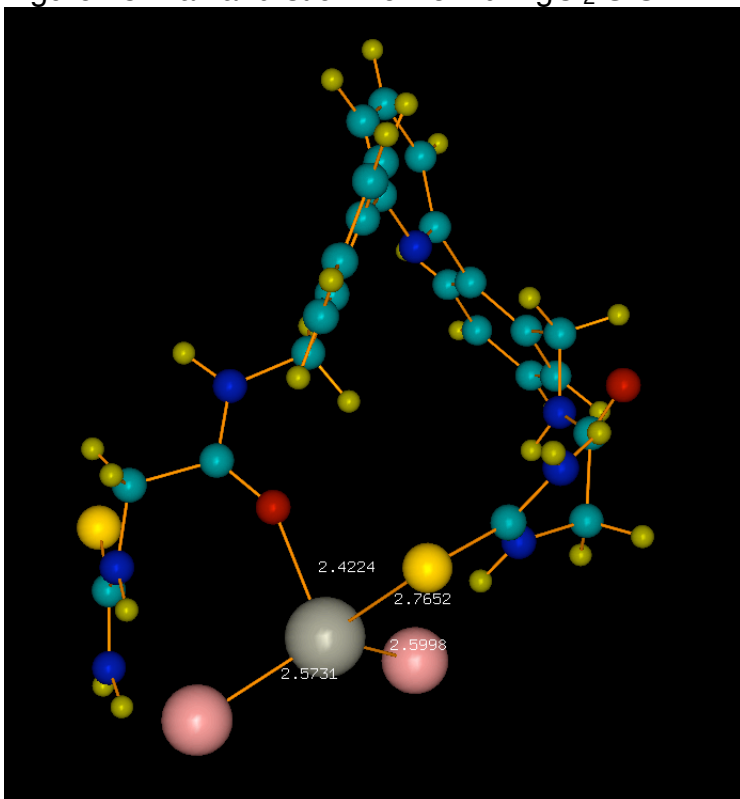

Figure 19. Space-filling view of **1a**•HgCl<sub>2</sub> S/O, with and without H atoms.

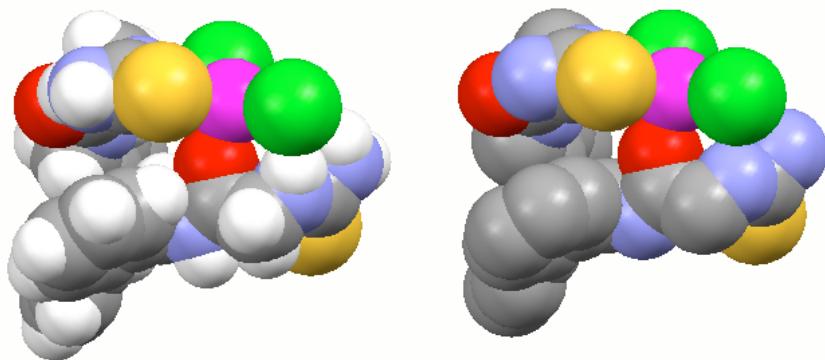

Figure 20. Ball-and-stick view of **1b**•HgCl<sub>2</sub> A.

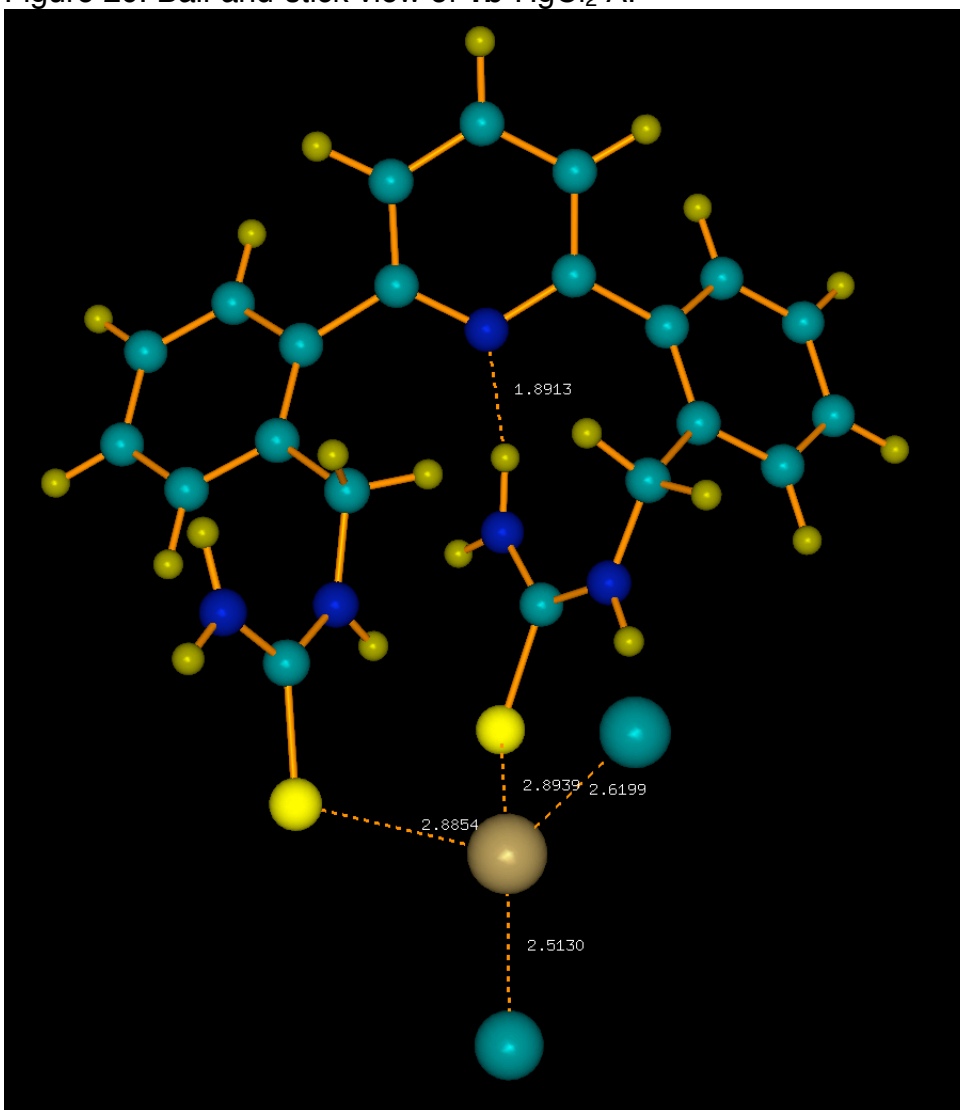

Figure 21. Space-filling view of **1b**•HgCl<sub>2</sub> A, with and without H atoms.

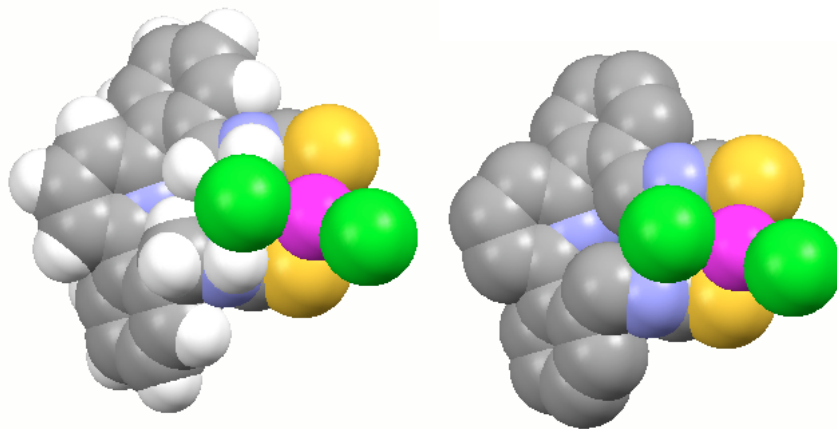

Figure 22. Ball-and-stick view of **1b**•HgCl<sub>2</sub> B.

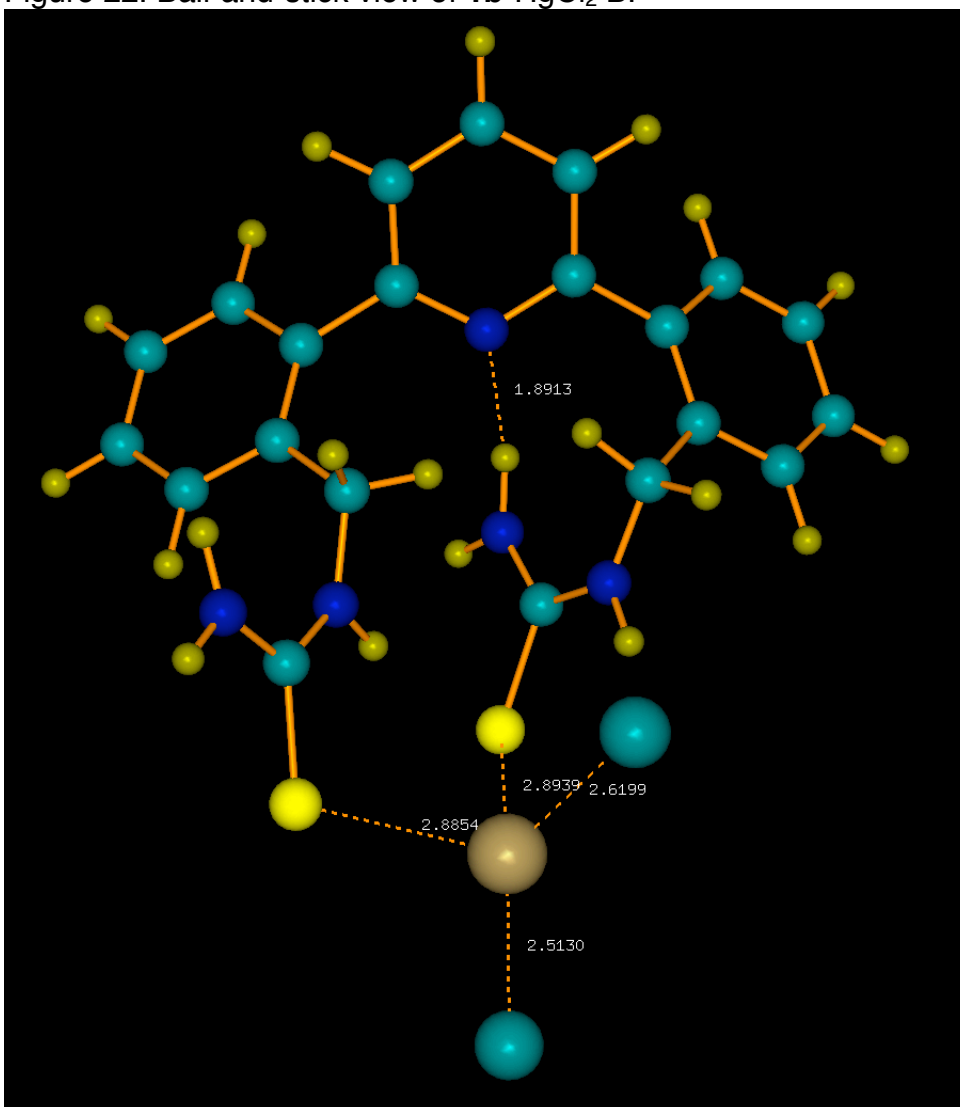

Figure 23. Space-filling view of **1b**•HgCl<sub>2</sub> B, with and without H atoms.

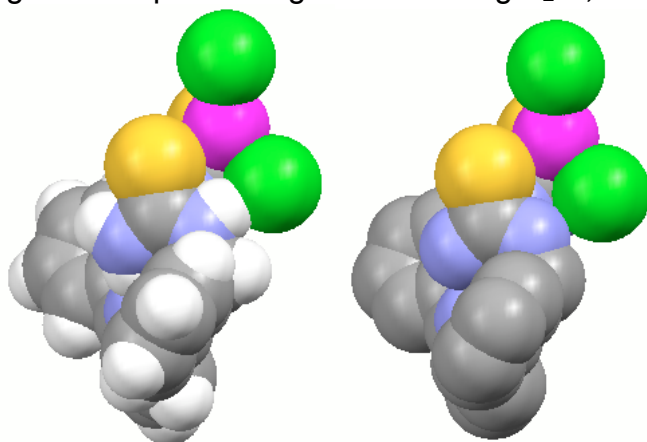

## 7. References

- (1) Lakowicz, J.R. *Principles of Fluorescent Spectroscopy*, 2nd ed. **1999**, New York, Kluwer Academic.
- (2) Demas, J.M.; Grosby, G. A. *J. Phys. Chem.* **1971**, 75, 991.
- (3) Berlman, I.B. *Handbook of Fluorescent Spectra* **1965**, New York, Academic Press.
- (4) Mello, J.V.; Finney, N. S. *J. Am. Chem. Soc.* **2005**, 127, 10124.
- (5) Angyal, S.J. *Org. React.* **1954**, 8, 197.
- (6) Carotti, A.; Campagna, F. *Synthesis*, **1979**, 56.
- (7) van de Water, L.G.A.; ten Hoonte, F.; Driessen, W. L.; Reedijk, J.; Sherrington, D. C. *Inorg. Chim. Acta* **2000**, 303, 77.
- (8) Connors, K.A. *Binding Constants: The Measurement of Molecular Complex Stability* **1987**, New York, John Wiley and Sons.

## 8. $^1\text{H}$ and $^{13}\text{C}$ NMR Spectra

We have noted that all biarylpyridine compounds bearing a vinylogous amide at C4 of the pyridine ring undergo gradual photochemical isomerization under fluorescent light. The NMR spectra thus show the presence of small amounts of the (*Z*)-isomer in addition to the dominant (*E*)-isomer. We have confirmed the identity of the (*Z*)-isomer by deliberate photochemical isomerization to prepare samples with sufficient amounts of the minor isomer to allow full peak assignment in the case of **1a**.





DUAL\_1H\_no\_peak CDCl3 v sienmr 7

7.67  
7.52  
7.49  
7.43  
7.42  
7.40  
7.39  
7.04  
6.97  
6.96  
6.95  
6.94  
6.93  
6.66

4.39  
4.38  
4.37  
4.36  
4.35  
4.34  
4.31  
4.29  
4.26  
3.81  
3.80  
3.63  
3.62

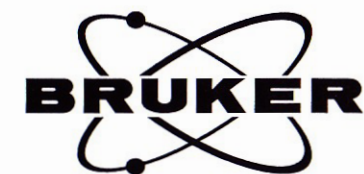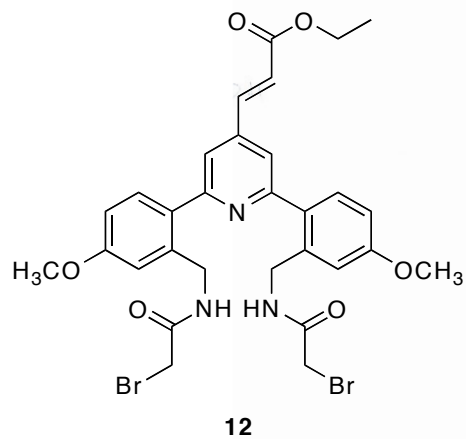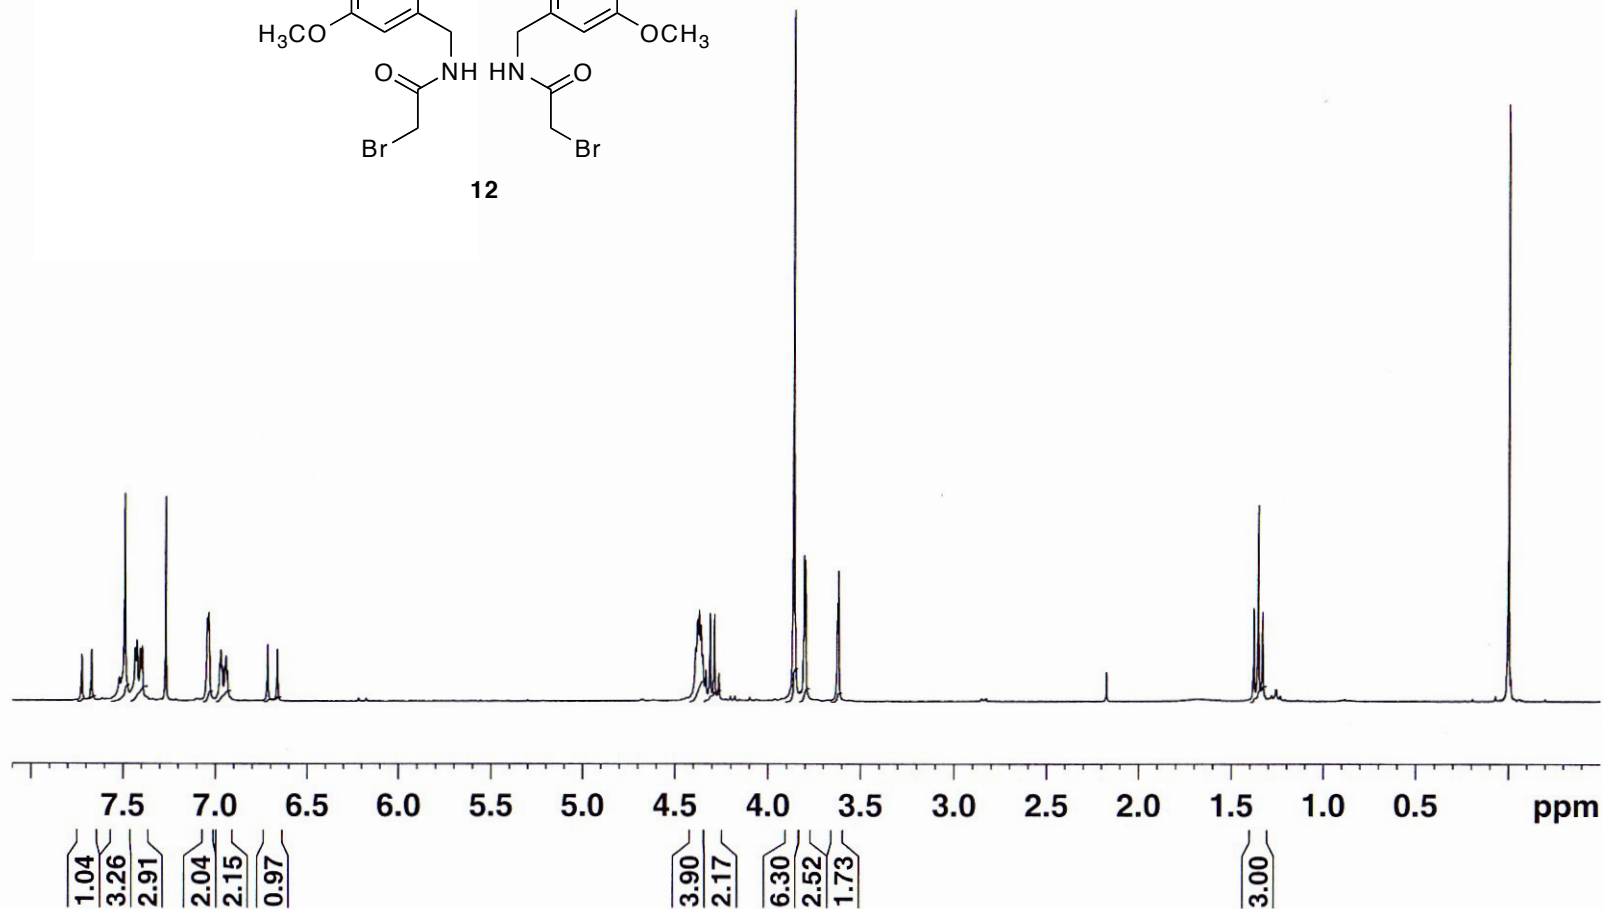

AV2-400: 1H of

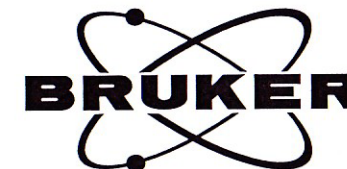

Current Data Parameters  
 NAME SM162  
 EXPNO 2  
 PROCNO 2

F2 - Acquisition Parameters

Date\_ 20081212  
 Time 9.40  
 INSTRUM spect  
 PROBHD 5 mm PAQNP Swi  
 PULPROG zg  
 TD 65536  
 SOLVENT CDCl3  
 NS 16  
 DS 2  
 SWH 12335.526 Hz  
 FIDRES 0.188225 Hz  
 AQ 2.6564426 sec  
 RG 128  
 DW 40.533 usec  
 DE 6.00 usec  
 TE 300.0 K  
 D1 3.0000000 sec  
 TD0 1

===== CHANNEL f1 =====  
 NUC1 1H  
 P1 12.00 usec  
 PL1 -3.00 dB  
 SFO1 400.1324008 MHz

F2 - Processing parameters  
 SI 65536  
 SF 400.1300359 MHz  
 WDW no  
 SSB 0  
 LB 0.00 Hz  
 GB 0  
 PC 1.00

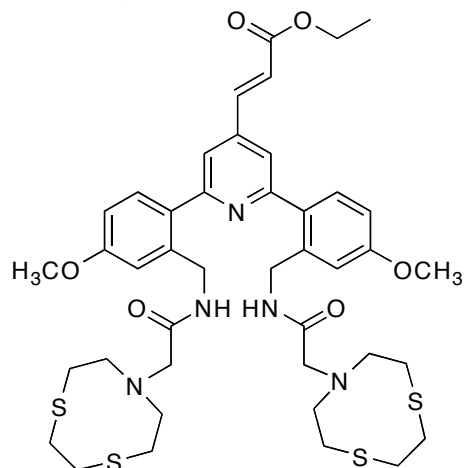

1h

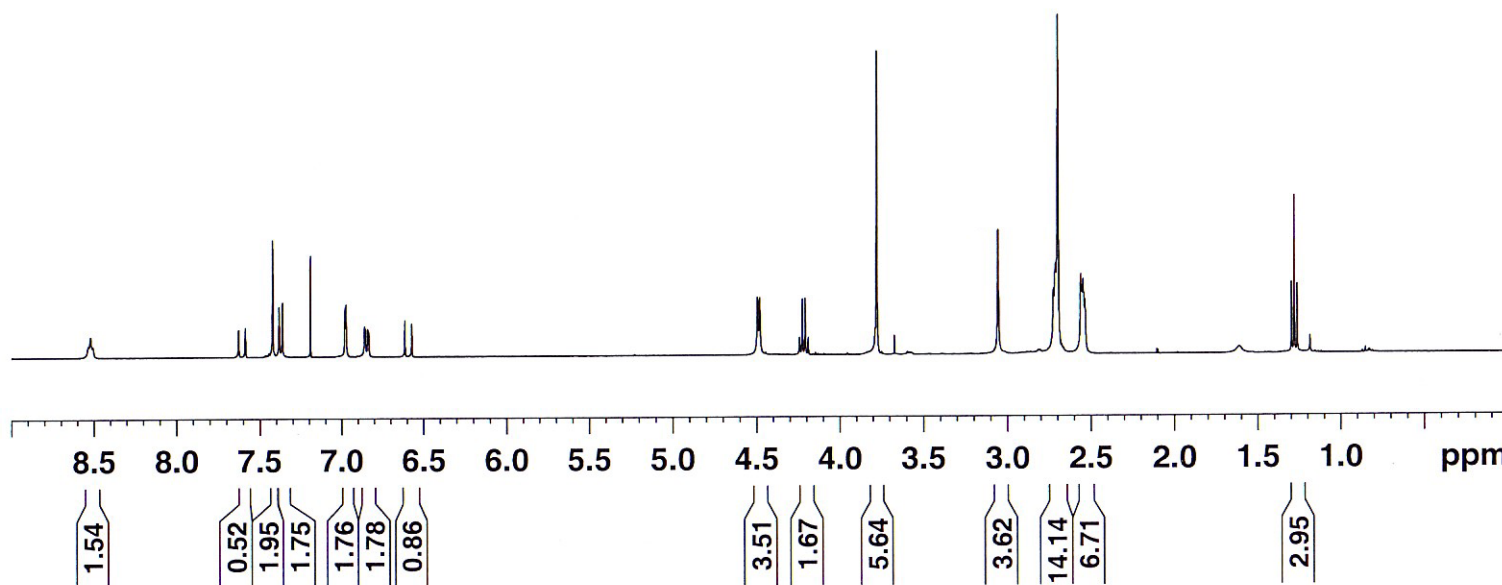

# DUAL\_1H CDCl3 v sienmr 35

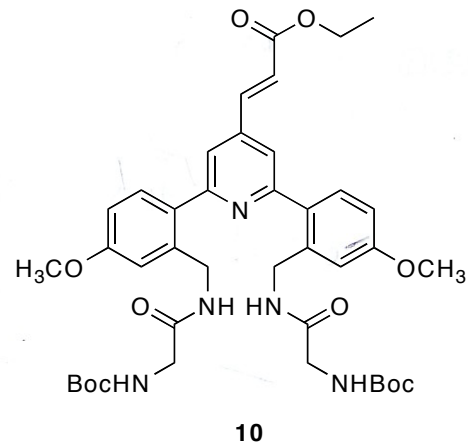

Current Data Parameters  
NAME SM071  
EXPNO 1  
PROCNO 1

F2 - Acquisition Parameters  
Date\_ 20080211  
Time 16.18  
INSTRUM arx300  
PULPROG zg30  
TD 32768  
NS 16  
DS 2  
SWH 6250.000 Hz  
FIDRES 0.190735 Hz  
D1 1.00000000 sec  
P1 7.50 usec

F2 - Processing parameters  
SI 32768  
SF 300.1300038 MHz  
WDW EM  
SSB 0  
LB 0.20 Hz  
GB 0  
PC 1.00

1D NMR plot parameters  
PPMCM 0.30263 ppm/cm  
HZCM 90.82881 Hz/cm

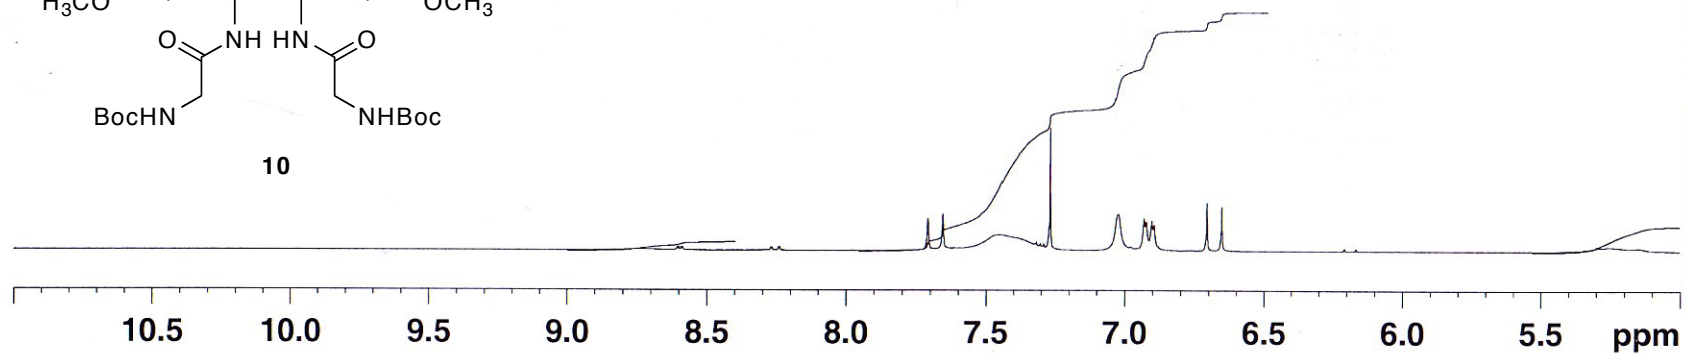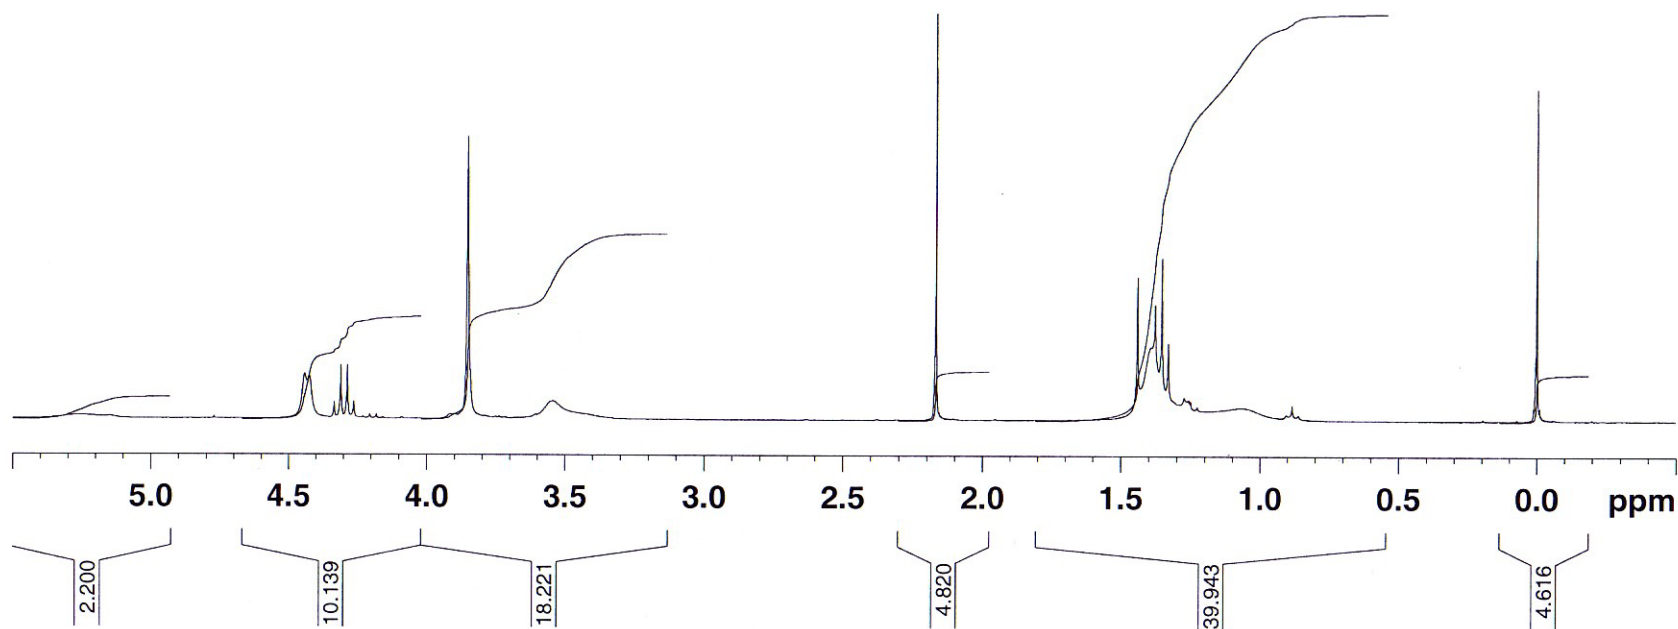

AV2-400: 1H of

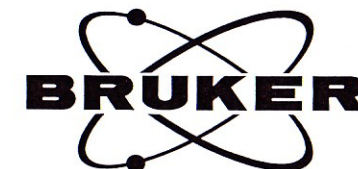

Current Data Parameters  
 NAME SM073.2  
 EXPNO 41  
 PROCNO 2

F2 - Acquisition Parameters  
 Date\_ 20080215  
 Time 18.37  
 INSTRUM spect  
 PROBHD 5 mm PAQNP Swi  
 PULPROG zg  
 TD 65536  
 SOLVENT CD2Cl2  
 NS 16  
 DS 2  
 SWH 12335.526 Hz  
 FIDRES 0.188225 Hz  
 AQ 2.6564426 sec  
 RG 80.6  
 DW 40.533 usec  
 DE 6.00 usec  
 TE 300.0 K  
 D1 3.00000000 sec  
 TD0 1

===== CHANNEL f1 =====  
 NUC1 1H  
 P1 12.00 usec  
 PL1 -3.00 dB  
 SFO1 400.1324008 MHz

F2 - Processing parameters  
 SI 65536  
 SF 400.1300153 MHz  
 WDW no  
 SSB 0  
 LB 0.00 Hz  
 GB 0  
 PC 1.00

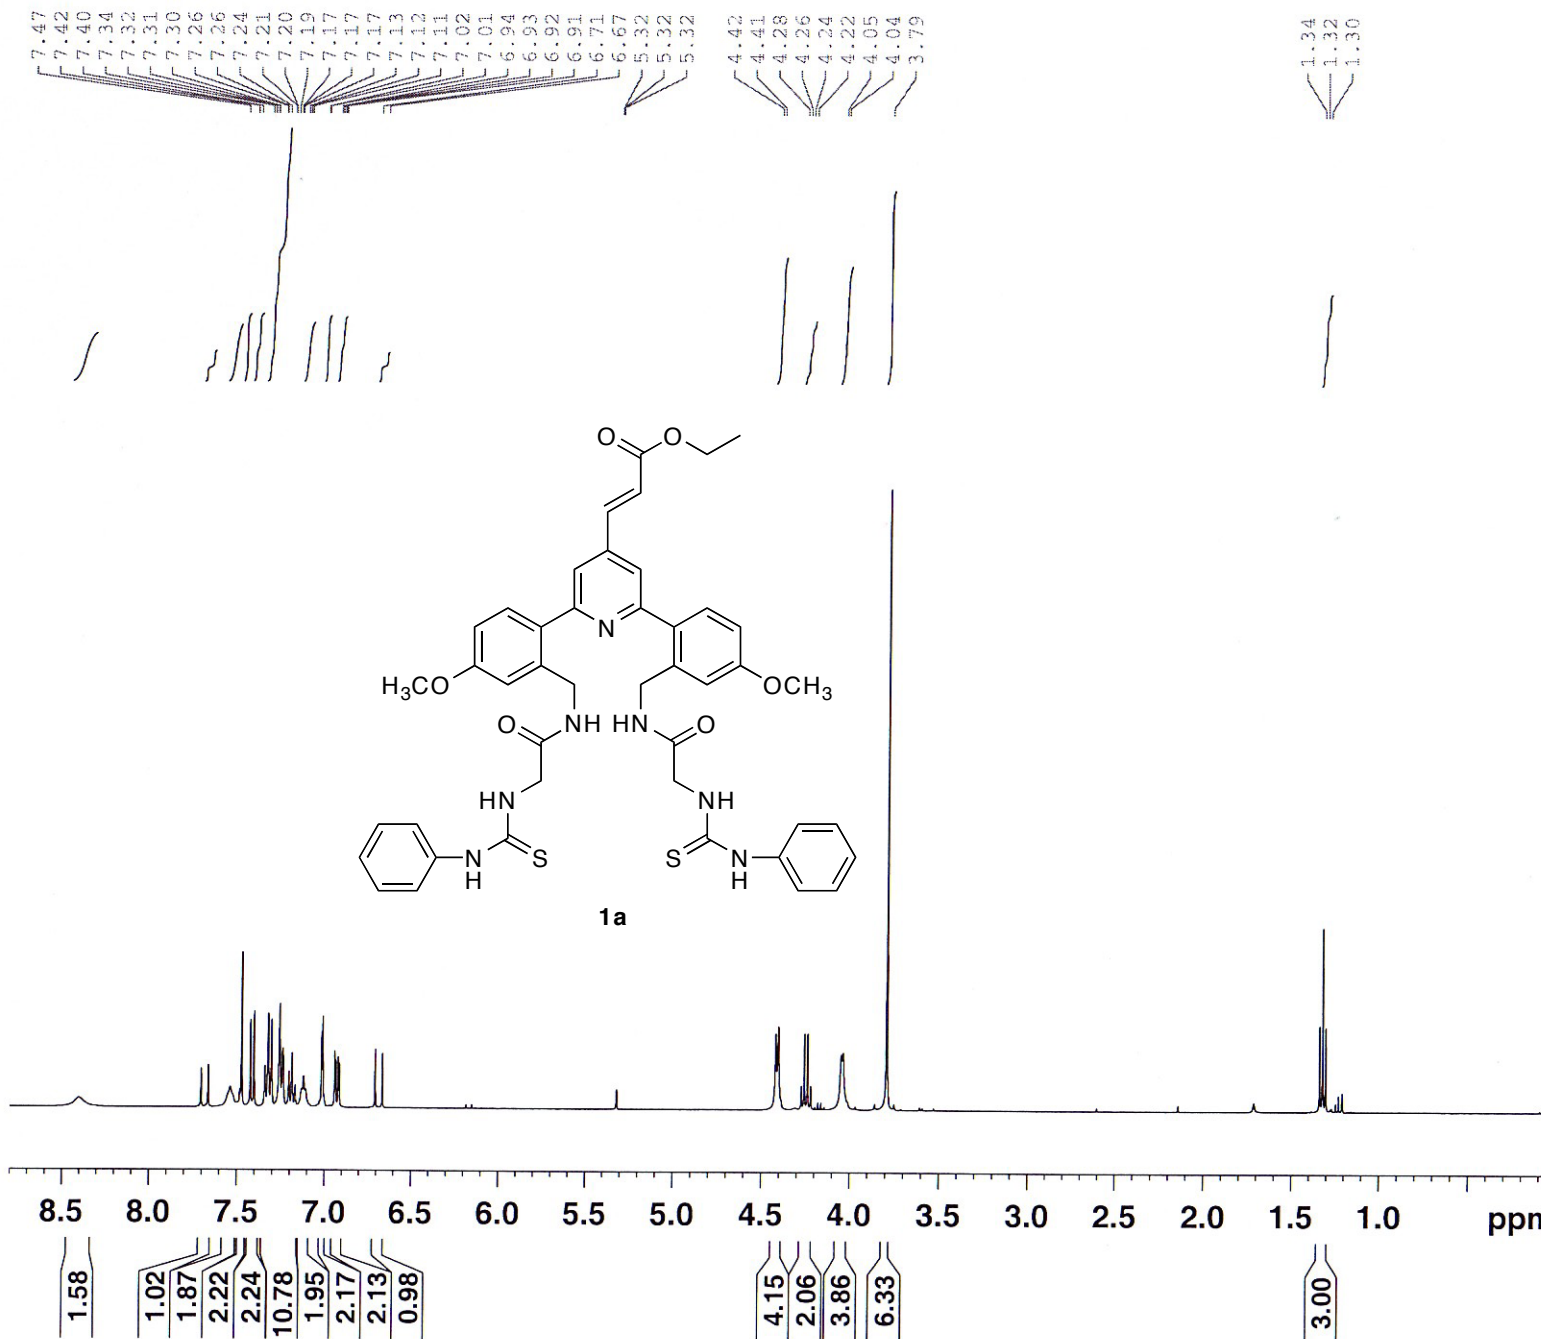

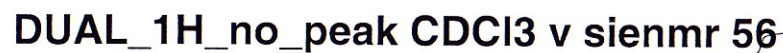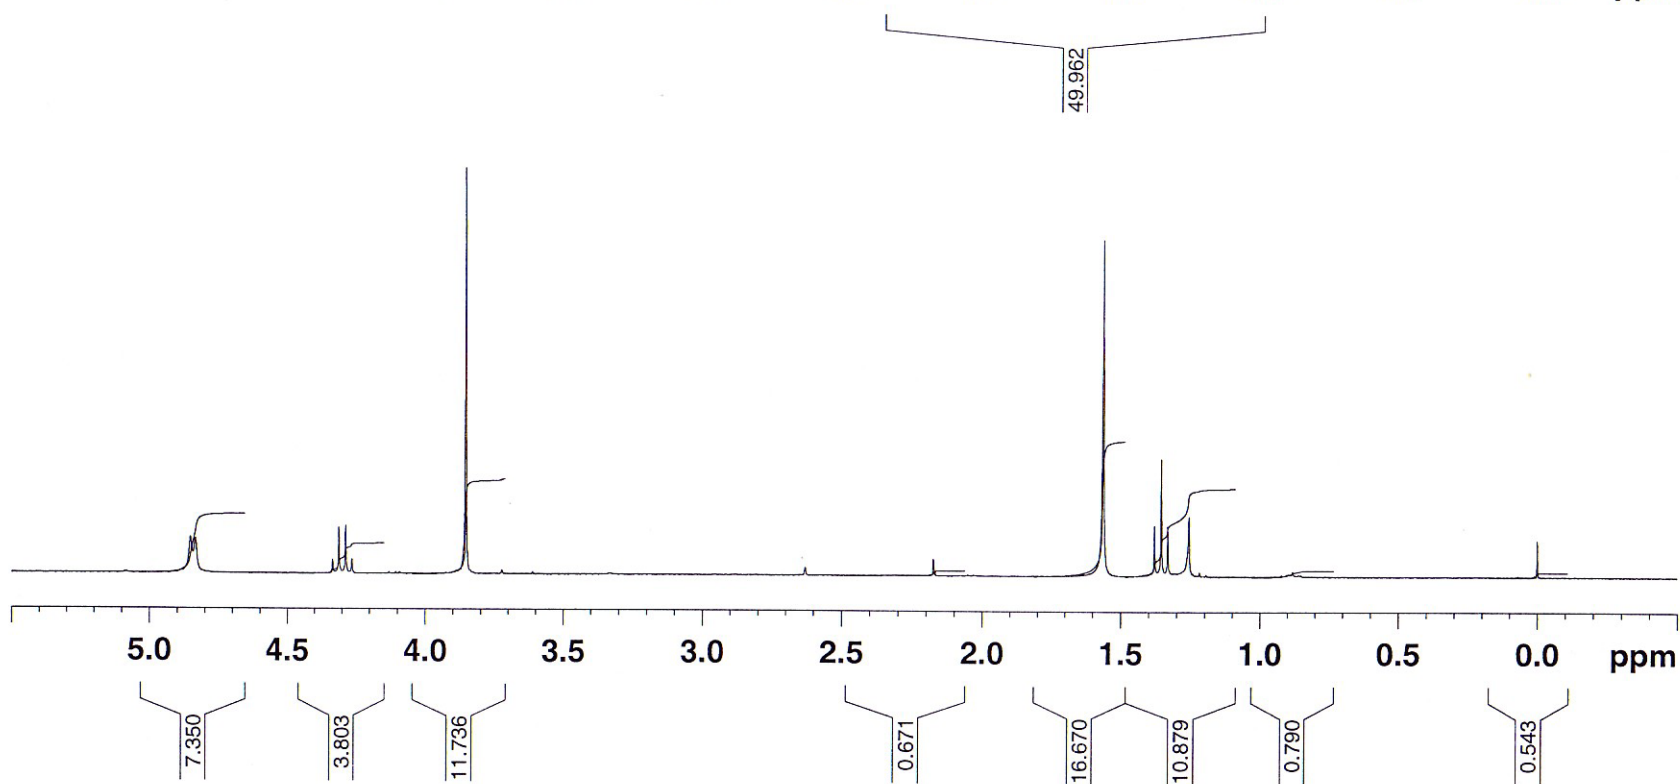



# DUAL\_13C.1H Aceton v sienmr 28

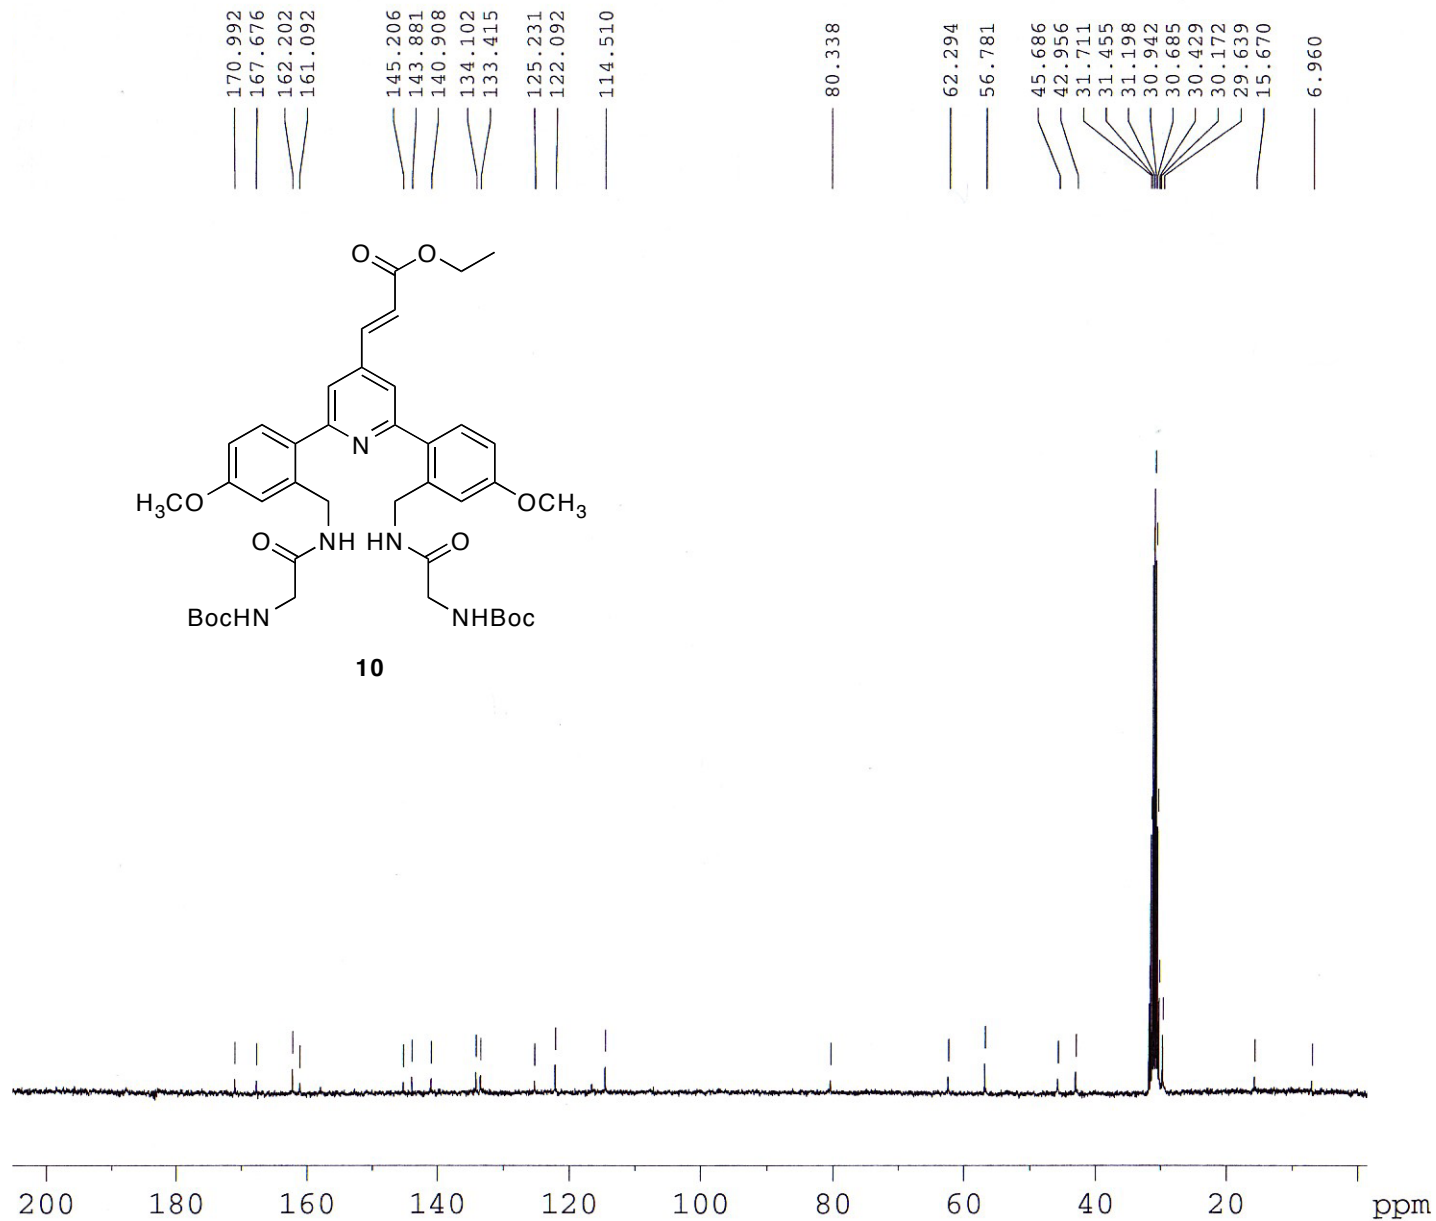

Current Data Parameters

|        |         |
|--------|---------|
| NAME   | SM061.1 |
| EXPNO  | 2       |
| PROCNO | 1       |

F2 - Acquisition Parameters

|         |                |
|---------|----------------|
| Date_   | 20080129       |
| Time    | 19.06          |
| INSTRUM | arx300         |
| PULPROG | zgpg30         |
| TD      | 32768          |
| NS      | 512            |
| DS      | 4              |
| SWH     | 17857.143 Hz   |
| FIDRES  | 0.544957 Hz    |
| D1      | 1.00000000 sec |
| P1      | 6.50 usec      |
| D12     | 0.0000200 sec  |
| D11     | 0.0300000 sec  |

F2 - Processing parameters

|     |                |
|-----|----------------|
| SI  | 32768          |
| SF  | 75.4675982 MHz |
| WDW | EM             |
| SSB | 0              |
| LB  | 2.00 Hz        |
| GB  | 0              |
| PC  | 1.40           |

# DUAL\_13C.1H CDCl3 v sienmr 6

Current Data Parameters  
 NAME I19SM81.2  
 EXPNO 2  
 PROCNO 1

F2 - Acquisition Parameters  
 Date\_ 20060508  
 Time 14.12  
 INSTRUM arx300  
 PULPROG zgpg30  
 TD 32768  
 NS 512  
 DS 4  
 SWH 17857.143 Hz  
 FIDRES 0.544957 Hz  
 D1 1.00000000 sec  
 P1 6.50 usec  
 D12 0.0000200 sec  
 D11 0.0300000 sec

F2 - Processing parameters  
 SI 32768  
 SF 75.4677469 MHz  
 WDW EM  
 SSB 0  
 LB 2.00 Hz  
 GB 0  
 PC 1.40

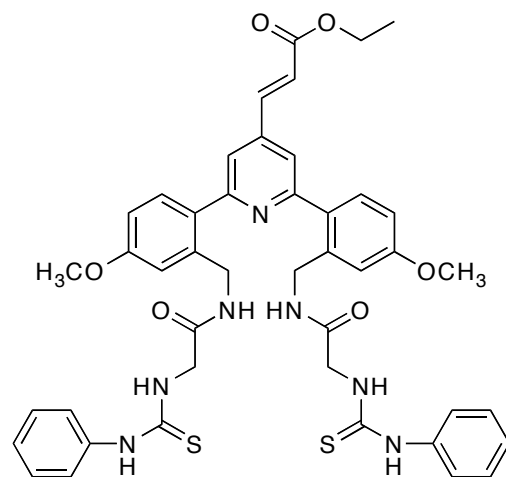

1a

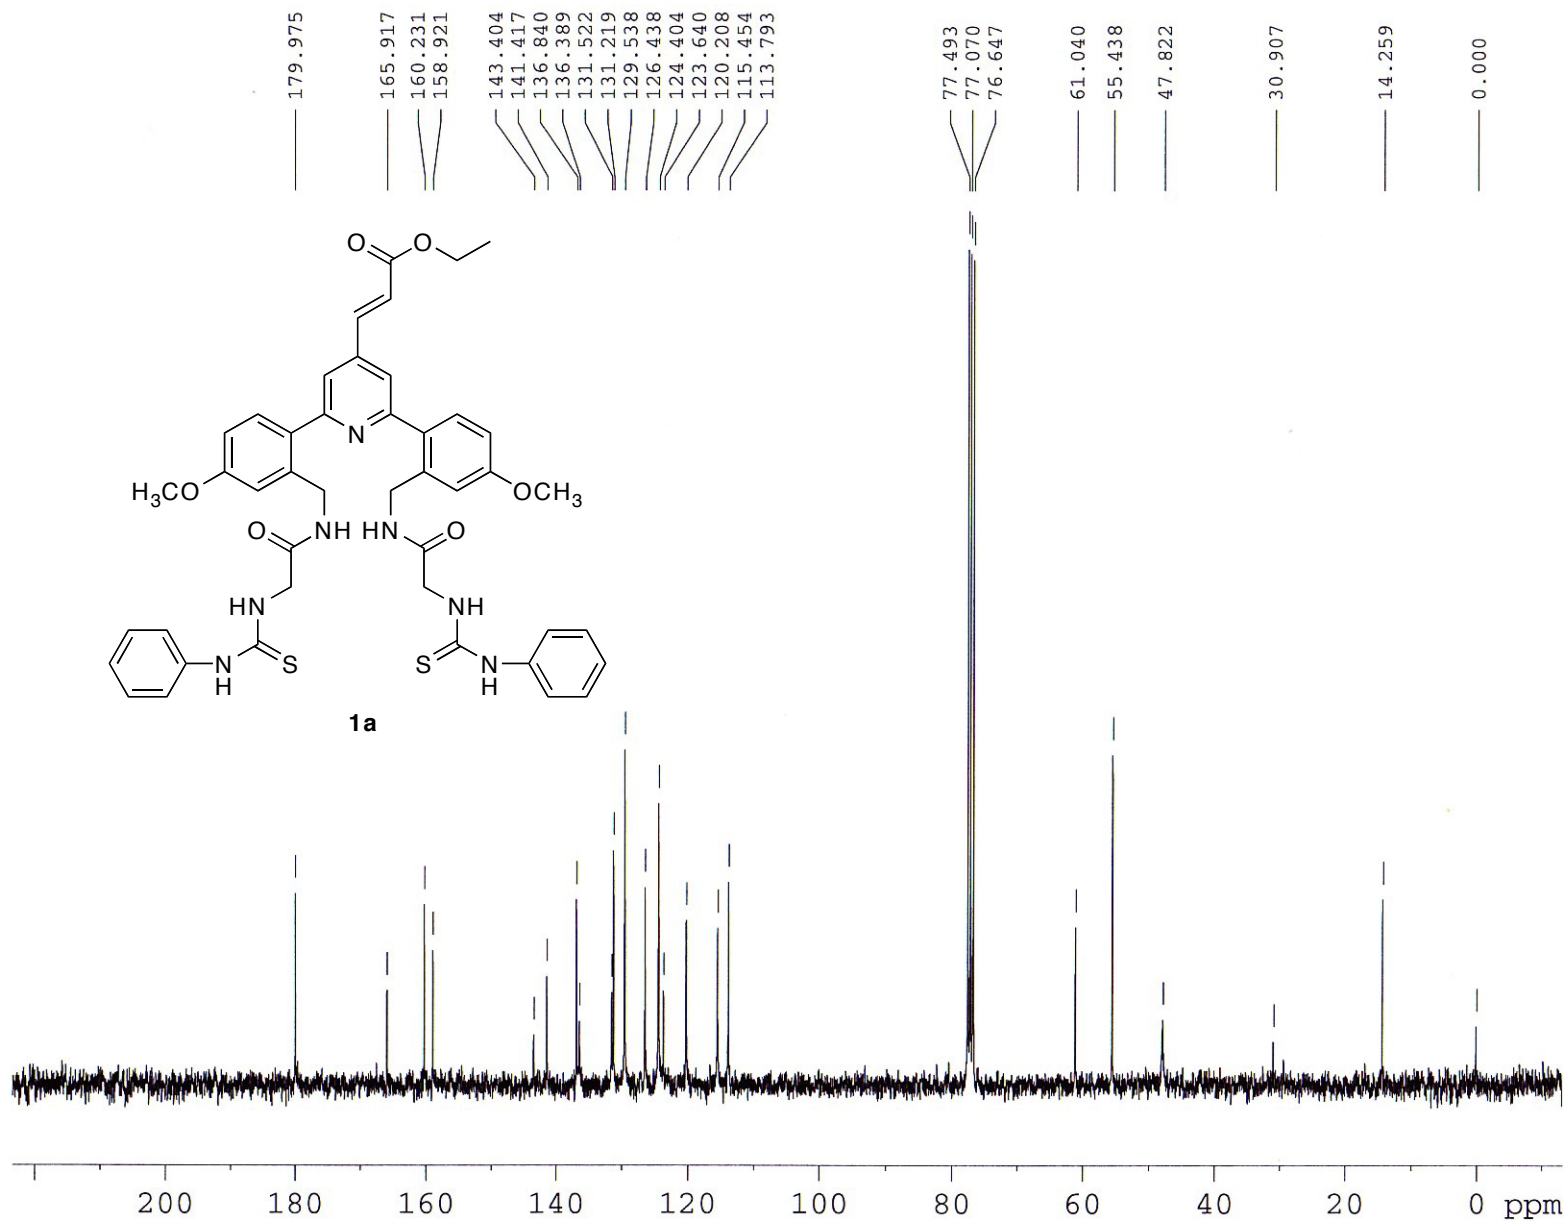



AV2400: {<sup>13</sup>C{<sup>1</sup>H} OF

181.22  
168.67  
166.67  
160.67  
159.67  
144.19  
142.04  
138.28  
132.53  
131.96  
130.16  
127.06  
126.95  
125.18  
123.97  
120.73  
115.87  
113.73

61.55  
56.06  
54.00  
48.69  
42.37

14.61

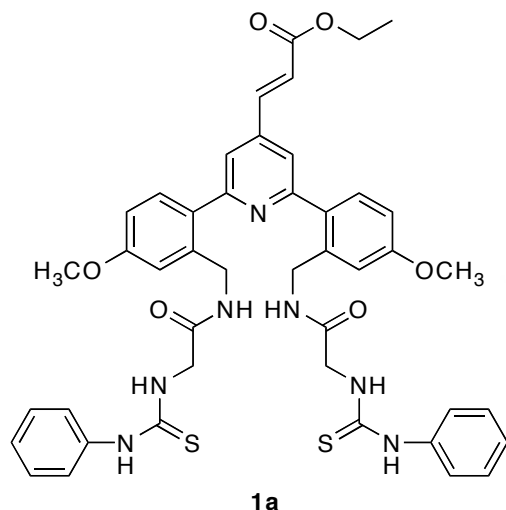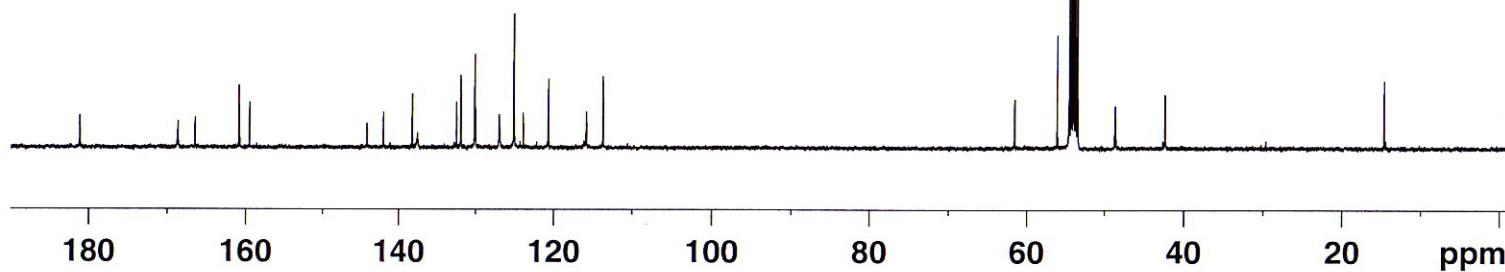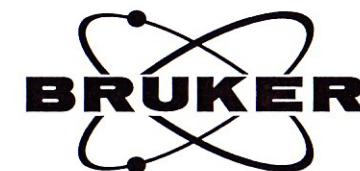

Current Data Parameters  
NAME SM073.2  
EXPNO 42  
PROCNO 1

F2 - Acquisition Parameters  
Date\_ 20080216  
Time 5.57  
INSTRUM spect  
PROBHD 5 mm PAQNP Swi  
PULPROG zgpg30  
TD 65536  
SOLVENT CD2Cl2  
NS 10240  
DS 4  
SWH 39062.500 Hz  
FIDRES 0.596046 Hz  
AQ 0.8389108 sec  
RG 2050  
DW 12.800 usec  
DE 6.00 usec  
TE 300.0 K  
D1 3.00000000 sec  
d11 0.03000000 sec  
DELTA 2.90000010 sec  
TD0 1

===== CHANNEL f1 =====  
NUC1 <sup>13</sup>C  
P1 8.40 usec  
PL1 -2.00 dB  
SFO1 100.6238364 MHz

===== CHANNEL f2 =====  
CPDPRG2 waltz16  
NUC2 <sup>1</sup>H  
PCPD2 80.00 usec  
PL12 16.00 dB  
PL13 18.00 dB  
PL2 -3.00 dB  
SFO2 400.1316005 MHz

F2 - Processing parameters  
SI 65536  
SF 100.6127100 MHz  
WDW EM  
SSB 0  
LB 1.00 Hz  
GB 0  
PC 1.40

336  
 NAME SM107  
 EXPNO 43  
 PROCNO 1  
 Date\_ 20090919  
 Time 6.52  
 INSTRUM spect  
 PROBHD 5 mm PABBO BB-  
 PULPROG zgpg30  
 TD 65536  
 SOLVENT CDCl3  
 NS 11000  
 DS 4  
 SWH 24038.461 Hz  
 FIDRES 0.366798 Hz  
 AQ 1.3631988 sec  
 RG 2050  
 DW 20.800 usec  
 DE 6.00 usec  
 TE 300.0 K  
 D1 3.00000000 sec  
 D11 0.03000000 sec  
 TD0 1

===== CHANNEL f1 =====  
 NUC1 13C  
 PL 9.50 usec  
 PL1 3.00 dB  
 PL1W 46.70613098 W  
 SFO1 100.6479773 MHz

===== CHANNEL f2 =====  
 CPDPRG2 waltz16  
 NUC2 1H  
 PCPD2 80.00 usec  
 PL2 3.00 dB  
 PL12 19.05 dB  
 PL13 21.50 dB  
 PL2W 9.80702877 W  
 PL12W 0.24352163 W  
 PL13W 0.13852796 W  
 SFO2 400.2316009 MHz  
 SI 65536  
 SF 100.6379137 MHz  
 WDW no  
 SSB 0  
 LB 0.00 Hz  
 GB 0  
 PC 1.40

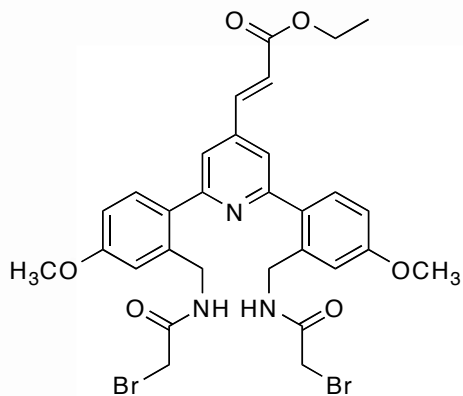

12

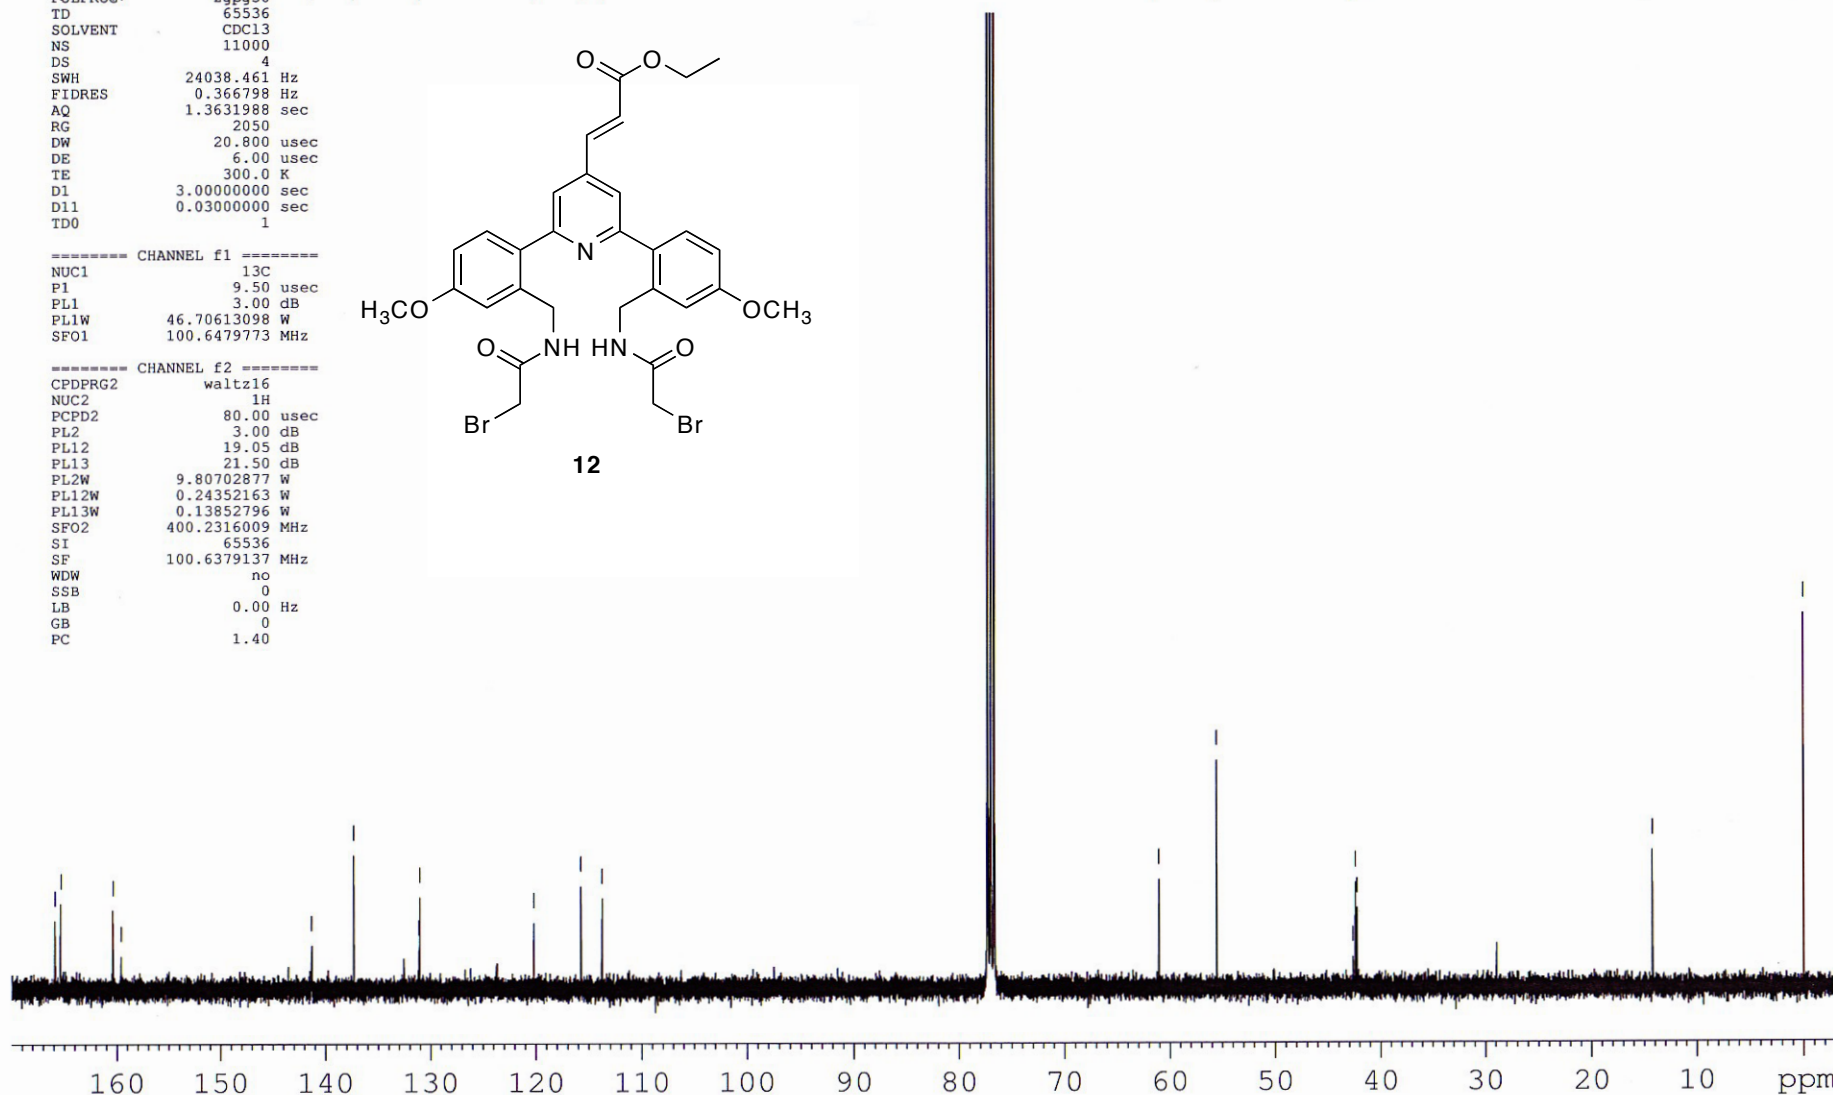

AV2-400: 13C{1H} of

— 14.255

— 0.000

AV2-400: 13C{1H} of

171.09  
166.52  
160.60  
159.67

143.28  
142.39  
138.52  
133.03  
131.94

123.68  
120.68  
115.76  
113.76

61.44  
60.87  
56.69  
56.00

41.89  
34.68  
33.26

14.78

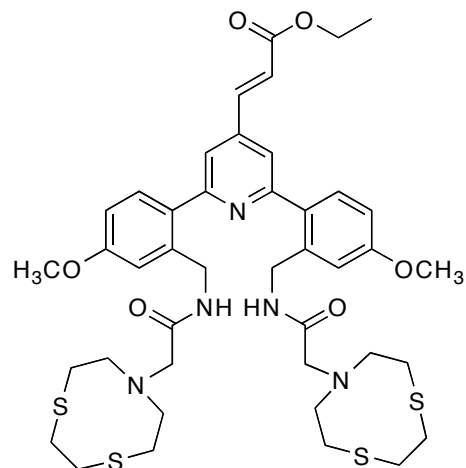

1h

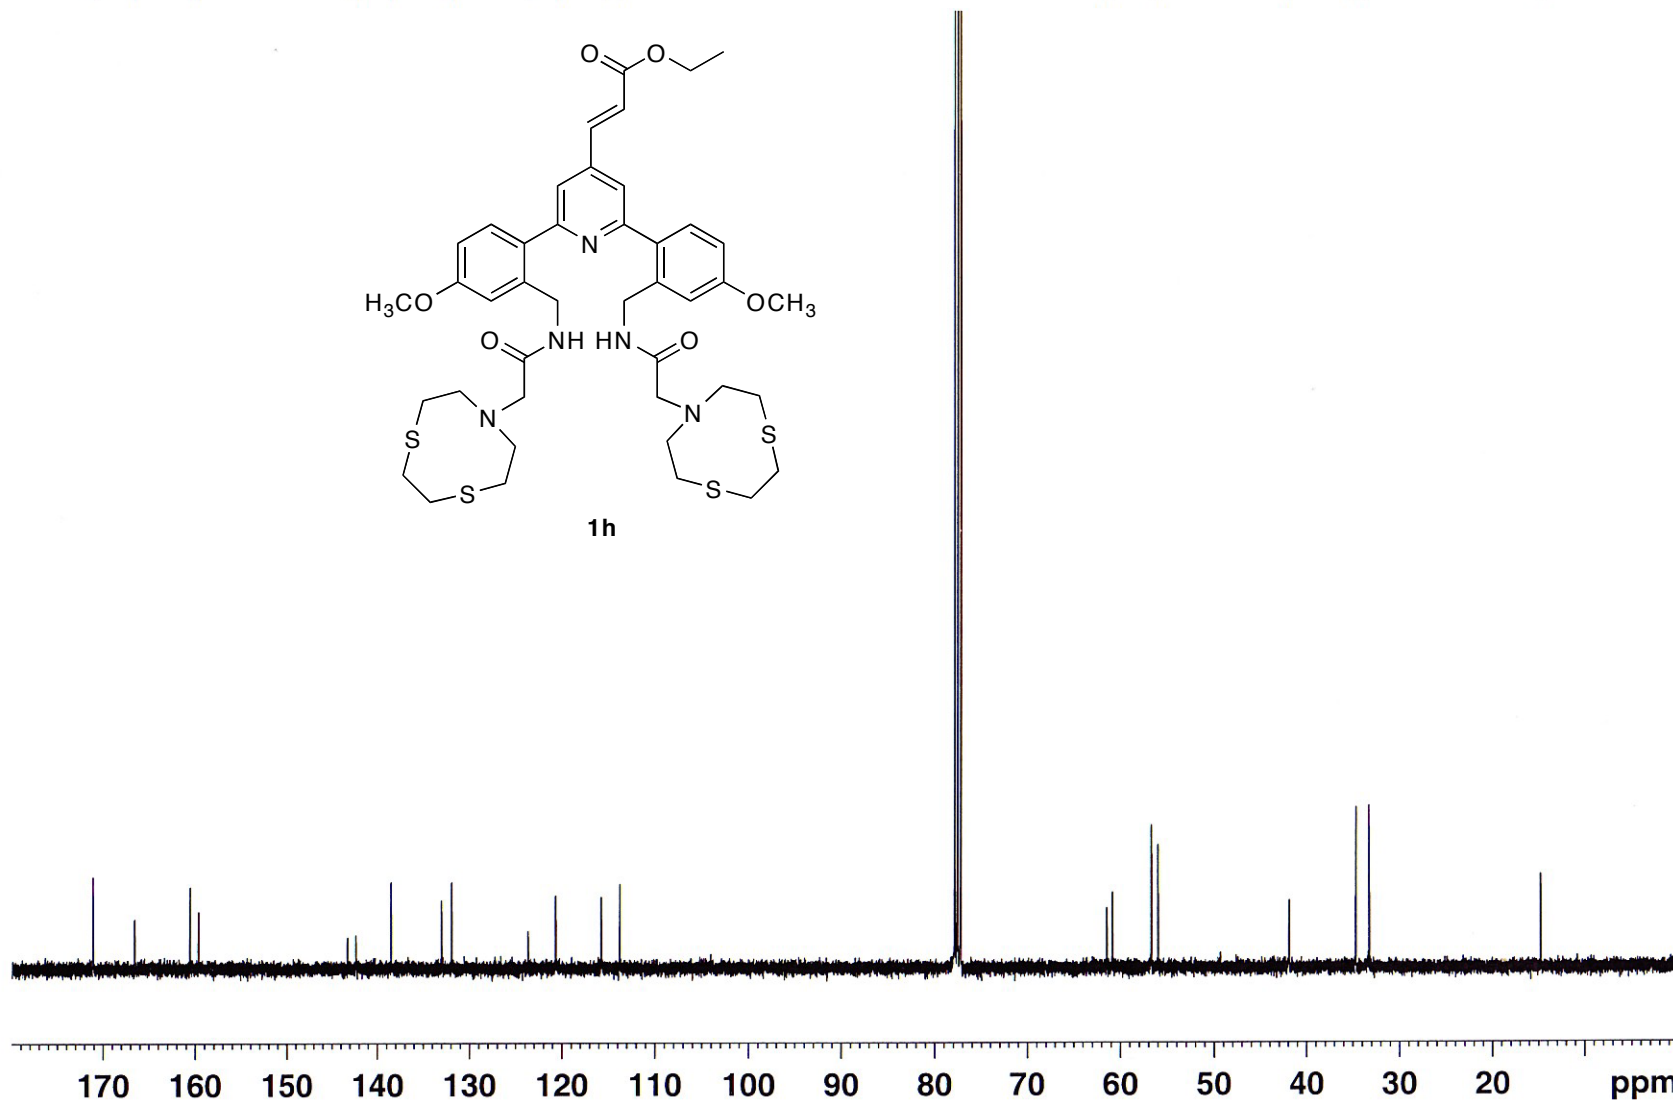

Current Data Parameters  
NAME SM162  
EXPNO 3  
PROCNO 3

F2 - Acquisition Parameters  
Date\_ 20081212  
Time 11.37  
INSTRUM spect  
PROBHD 5 mm PAQNP Swi  
PULPROG zgpg30  
TD 65536  
SOLVENT CDC13  
NS 1536  
DS 4  
SWH 39062.500 Hz  
FIDRES 0.596046 Hz  
AQ 0.8389108 sec  
RG 2050  
DW 12.800 usec  
DE 20.00 usec  
TE 300.0 K  
D1 3.00000000 sec  
d11 0.03000000 sec  
DELTA 2.90000010 sec  
TD0 1

===== CHANNEL f1 =====  
NUC1 13C  
P1 8.40 usec  
PL1 -2.00 dB  
SFO1 100.6238364 MHz

===== CHANNEL f2 =====  
CPDPRG2 waltz16  
NUC2 1H  
PCPD2 80.00 usec  
PL12 16.00 dB  
PL13 18.00 dB  
PL2 -3.00 dB  
SFO2 400.1316005 MHz

F2 - Processing parameters  
SI 65536  
SF 100.6127182 MHz  
WDW no  
SSB 0  
LB 0.00 Hz  
GB 0  
PC 1.40
